# Supplementary material for: Long-term psychological consequences of symptomatic pulmonary embolism: a qualitative study
Source: PubMed Central journal article supplement — BMJ Open. 2014 Apr 1;4(4):e004561. doi: 10.1136/bmjopen-2013-004561 (PMC3987719; doi:10.1136/bmjopen-2013-004561), 2014-04-01
Supplement: bmjopen-2013-004561.draft_revisions.pdf [file bmjopen-2013-004561.draft_revisions.pdf]

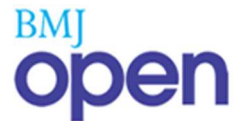

**The long-term psychological consequences of symptomatic pulmonary embolism: a qualitative study.**

|                                 |                                                                                                                                                                                                                                                                                                          |
|---------------------------------|----------------------------------------------------------------------------------------------------------------------------------------------------------------------------------------------------------------------------------------------------------------------------------------------------------|
| Journal:                        | <i>BMJ Open</i>                                                                                                                                                                                                                                                                                          |
| Manuscript ID:                  | bmjopen-2013-004561                                                                                                                                                                                                                                                                                      |
| Article Type:                   | Research                                                                                                                                                                                                                                                                                                 |
| Date Submitted by the Author:   | 26-Nov-2013                                                                                                                                                                                                                                                                                              |
| Complete List of Authors:       | Noble, Simon; Cardiff University, Palliative Medicine<br>Lewis, Rhian; Swansea University, Clinical Psychology<br>Whithers, Jodie; Swansea University, Clinical Psychology<br>Lewis, Sarah; Aneurin Bevan University Health Board, Haematology<br>Bennett, Paul; Swansea University, Clinical Psychology |
| <b>Primary Subject Heading</b>: | Qualitative research                                                                                                                                                                                                                                                                                     |
| Secondary Subject Heading:      | Patient-centred medicine, Mental health, Haematology (incl blood transfusion), Communication                                                                                                                                                                                                             |
| Keywords:                       | Thromboembolism < CARDIOLOGY, Anticoagulation < HAEMATOLOGY, Anxiety disorders < PSYCHIATRY, QUALITATIVE RESEARCH, VASCULAR MEDICINE                                                                                                                                                                     |
|                                 |                                                                                                                                                                                                                                                                                                          |

SCHOLARONE™  
Manuscripts

1  
2  
3  
4 **The long-term psychological consequences of symptomatic pulmonary**  
5 **embolism: a qualitative study.**  
6  
7

8  
9 <sup>1</sup> Noble, Simon, <sup>2</sup> Lewis, Rhian , <sup>2</sup> Whithers, Jodie , <sup>3</sup> Lewis, Sarah , <sup>2</sup> Bennett, Paul  
10  
11

12  
13  
14  
15  
16  
17  
18  
19  
20  
21  
22  
23  
24 <sup>1</sup> Cardiff University - Palliative Medicine  
25 B6N Royal Gwent Hospital Cardiff Rd, Newport, South Wales  
26  
27 <sup>2</sup> Swansea University - Clinical Psychology  
28 Swansea  
29  
30 <sup>3</sup> Aneurin Bevan University Health Board - Haematology  
31 Abergavenny  
32  
33  
34  
35  
36  
37  
38  
39

40 Corresponding author:

41 Simon Noble,  
42 Marie Curie Palliative Medicine Research Group  
43 6<sup>th</sup> Floor  
44 Neuadd Meirionyd  
45 Cardiff University  
46 Heath Park Campus  
47 CF14 4YS  
48 Wales, UK  
49 Telephone: 02920687500  
50 Fax: 02920687501  
51  
52  
53  
54  
55  
56  
57  
58  
59  
60

## Objective

To explore the psychological consequences of experiencing symptomatic pulmonary embolism.

## Design

Qualitative interview based study using interpretative phenomenological analysis.

## Setting

Outpatients who attended an anticoagulation clinic in a district general hospital.

## Participants

Patients attending an anticoagulation clinic following hospital admission for symptomatic pulmonary embolism were approached to participate. A total of nine (4 female, 5 male) out of 11 patients approached, agreed to be interviewed. Participants were aged between 26 and 72 years and had experienced a PE between 9 and 60 months previously (median=26 months, mean=24 months).

## Intervention

Audiotaped semi structured qualitative interviews were undertaken to explore participants experiences of having a PE and how it had affected their lives since. Data was transcribed and analysed using interpretative phenomenological analysis to identify emergent themes.

## Results

Three major themes with associated sub themes were identified. Participants described having a PE as a life changing experience comprising of initial shock, followed by feeling of loss of self, life changing decisions and behavior modification. Features of post-traumatic stress disorder (PTSD) were described with flashbacks, hypervigilance and intrusive thoughts being most prevalent. Participants identified several areas of support needed for such patients including easier access to support through information giving and emotional support.

## Conclusion

The long-term consequences of VTE go beyond the physical alone. Patients describe experiencing symptomatic PE to be a life changing distressing event leading to behaviour modification and in some PTSD. It is likely that earlier psychological intervention may reduce such long-term sequelae.

1  
2  
3  
4 Strengths of this study

- 5 • This is the first time the psychological consequences of a common medical  
6 condition have been explored.
- 7 • This paper highlights an unmet clinical need
- 8 • This paper is of relevance to a breadth of health professionals
- 9 • This paper gives patients a voice

10  
11  
12 Weaknesses of the study

- 13 • The patients were recruited from a single site
  - 14 • Whilst appropriate in number for interpretative phenomenological  
15 analysis, the number of participants are small
  - 16 • The data cannot be generalised among all PE patients but highlights the  
17 need to explore the area further.
- 18  
19  
20  
21  
22  
23  
24  
25  
26  
27  
28  
29  
30  
31  
32  
33  
34  
35  
36  
37  
38  
39  
40  
41  
42  
43  
44  
45  
46  
47  
48  
49  
50  
51  
52  
53  
54  
55  
56  
57  
58  
59  
60

1  
2  
3 Venous thromboembolism (VTE), clinically presenting as deep venous  
4 thrombosis (DVT) or pulmonary embolism (PE), remains a major cause of  
5 morbidity and mortality worldwide, affecting 1 in 1000 patients annually(1). The  
6 long-term physical consequences of venous thromboembolism are well  
7 documented; post-thrombotic syndrome (PTS) complicates between 25 - 50%  
8 DVT cases (2-5) and 0.4 - 4% of patients who experience PE will develop chronic  
9 thromboembolic pulmonary hypertension (CTPH)(6-8). Both these  
10 complications represent a considerable healthcare burden. Patients with PTS  
11 may not only require long-term compression stockings but also endovascular  
12 surgery if symptoms prove refractory (9). For patients who develop CTPH,  
13 medical therapy is yet to demonstrate any survival advantage leaving pulmonary  
14 thromboendarterectomy as the treatment of choice (10, 11). However only half  
15 of the patients will qualify for surgery and, of the remainder, 50% are likely to  
16 die within a year if their mean pulmonary arterial pressure exceeds 50  
17 mmHg(11, 12).

18  
19  
20  
21  
22  
23  
24  
25  
26  
27  
28 The long-term sequelae following acute VTE go beyond the physical alone. The  
29 development of PTS appears to have a negative impact on quality of life (QoL) in  
30 patients experiencing VTE (13, 14). Using the Venous Insufficiency  
31 Epidemiologic and Economic Study quality-of-life questionnaire (VEINES-QOL)  
32 and its validated subscale of 10 items on venous symptoms (VEINES-Sym),  
33 patients with PTS were shown to have significantly worse disease-specific  
34 quality-of-life scores than those without PTS (P =0.003), which worsened  
35 significantly with increasing severity of PTS (13, 14). Furthermore, the  
36 development of PTS is considered major determinant of a patients' health related  
37 QoL two years after VTE (14).

38  
39  
40  
41  
42  
43  
44  
45  
46  
47  
48  
49  
50  
51  
52  
53  
54  
55  
56  
57  
58  
59  
60  
Whilst the physical consequences of VTE have been extensively reported, the  
possible impact of VTE on patients' psychological and emotional well-being has  
received little attention. Other common and potentially life-threatening  
conditions such as cancer and myocardial infarction have been researched  
extensively with clear evidence that such illnesses can result in significant  
psychological morbidity. To date, no studies have investigated the impact of VTE  
on everyday life.

1  
2  
3 The experience of any health related crisis is likely to result in some form of  
4 emotional distress presenting in a variety of forms including worry, anxiety,  
5 intrusive ideation and dysphoric mood, amongst other negative emotional  
6 reactions(15, 16). This appears most pronounced in medical events that pose a  
7 significant threat to life and can manifest as anxiety, anger, depression and even  
8 symptoms of post-traumatic stress disorder (PTSD) (17-20). Historically PTSD  
9 has been associated with experiences of war, rape or attempted murder, where  
10 the individual is exposed to an external threat to the physical integrity of  
11 themselves or others. However research now suggests PTSD may also arise from  
12 internal physical experiences, particularly those associated with a direct or  
13 imminent threat to life(21, 22).

14  
15 Life-threatening and traumatic medical events are those most likely to cause  
16 psychological distress and behavioural changes associated with symptoms of  
17 PTSD (23). Risk for PTSD is heightened by the perception of uncertainty and/or  
18 unpredictability associated with the traumatic medical experience and worsened  
19 where the patient believes adverse outcomes to be inevitable or largely  
20 uncontrollable (24, 25). Since VTE is a potentially life threatening condition  
21 which often occurs in previously well patients, coupled with the uncertainty of  
22 recurrence it is possible that such patients are at increased risk of emotional  
23 distress, especially those who have experienced major PE(26). We therefore  
24 conducted a study to explore the psychological impact of VTE in patients who  
25 had experienced a major symptomatic PE.

## 26 27 28 29 30 31 32 33 34 35 36 37 38 39 40 41 42 **Methods**

43 This study was undertaken using qualitative methodologies, which have  
44 previously been used to evaluate patient experience and clinician attitudes  
45 regarding VTE management (27-29).  
46  
47  
48

49  
50 Ethical approval was obtained through the NHS South Wales Research Ethics  
51 Committee. Patients attending a dedicated haematology/ thrombosis clinic,  
52 within a district general hospital, were sequentially screened for inclusion into  
53 the study and invited by letter to participate. All eligible patients were invited to  
54 participate.  
55  
56  
57  
58  
59  
60

Inclusion criteria:

- Aged between 18 and 70 years of age
- Patients who had experienced a symptomatic PE which resulted in admission to hospital
- Able to consent and participate in a 30-minute interview.

Exclusion criteria:

- Presence of cancer
- Known history of previous mental illness or psychological distress prior to PE

Semi-structured interviews were carried out over a twelve-month period by two female researchers (RL and JW) as part of an MSc research project under the supervision of PB and SN. Both researchers were experienced in the field of clinical psychology and trained in conducting qualitative research. Following initial pilot testing, the interviews were conducted within patients' homes and guided by a prompt list to ensure that the same issues were discussed at each interview. Researchers had no prior relationship with participants or declared clinical interest in VTE management. Data were elicited on the following:

- Their experience of suffering a major PE, and
- How they felt this had affected or influenced their day-to-day lives in terms of
  - Routines and activities
  - Feelings, attitudes and beliefs about themselves

To facilitate this, questions were open-ended with the use of prompts to probe further into issues, which arose as significant or meaningful to the participant. Interviews were digitally recorded and transcribed verbatim. Field notes were also taken. Interviews took approximately thirty minutes each.

## Analysis

The analytic framework for this qualitative study was based on Interpretative Phenomenological Analysis (IPA)(30). IPA aims to explore how participants

1  
2  
3 make sense of their experience but is also interpretative, recognising the  
4 researcher's conceptions, and experience, as brought to the analysis.

5  
6 The data was analysed in the following stages:

- 7  
8
- 9 • The first transcript was read line-by-line and annotated with initial  
10 comments.
  - 11 • Initial comments were grouped into themes.
  - 12 • Connections between themes were developed until an organised master  
13 list and thematic rationale was achieved.
  - 14 • New themes were tested against the previous transcripts as non-  
15 recurring themes were tested against following transcripts. Connections  
16 across cases were noted to identify a set of super-ordinate themes for the  
17 group.
- 18  
19  
20  
21  
22

23 A coding framework for emergent themes was then developed and applied  
24 across the data corpus. Initial coding was undertaken independently by RL and  
25 JW and then validated by SN and PB.  
26  
27  
28

## 29 30 **Results**

### 31 **Participant characteristics**

32  
33  
34 Of eleven eligible participants invited, nine (5 male and 4 female) agreed to  
35 participate in the study. Previous IPA-based studies within the field of health  
36 psychology have recommended a minimum of three to six participants to achieve  
37 saturation of themes (30). Patient characteristics are summarised in table 1.  
38 Patients were aged between 26 and 72 years old (median=44, mean=45). All  
39 patients had been hospitalized following a symptomatic PE between 9 and 60  
40 months previously (median=26 months, mean=24 months). The majority of  
41 patients presented with progressive dyspnea. Two described sudden onset  
42 symptoms and two patients had cardiovascular compromise from the PE. Two  
43 major themes were identified with associated subthemes Major themes with  
44 associated subthemes identified are summarized in figure one and were: PE as a  
45 life changing event, development of post traumatic stress disorder and  
46 identification of support needs.  
47  
48  
49  
50  
51  
52  
53  
54  
55  
56  
57  
58  
59  
60



### **Major theme 1: Life changing event**

Patients viewed their experience of a PE as a life-changing event, which had significant impact on their emotions, behaviors and how they viewed themselves and the future. Having gone from being healthy individuals with no major comorbidities patients reported on-going and significant emotional distress following their diagnosis. The major components of this distress came from the initial shock of the diagnosis and ongoing uncertainty of the future.

#### **Shock/ distress at uncertainty**

Patients described uncertainty as a prominent source of emotional distress and discontent, as well as having impacted on how they behave in their day-to-day lives. Uncertainty was most commonly associated with feelings of worry and anxiety in relation to 'not knowing' and concerns about treatment, their future health and life-expectancy and the physical effects of their condition on their day-to-day life. For example, patients often referred to feelings of worry and anxiety in relation to not knowing whether or when they would experience another major PE.

*"So I think having to live with that, the uncertainty, has caused me to worry a lot because no one can say for definite that A, it will never happen and B if it did it would never get to the level where next time I wouldn't be so lucky. I think that's the hardest part, just not knowing if or when it's ever going to happen again". 2F*

*"But, it was just a bit, a bit of a shock because obviously, I am young, and it doesn't really happen to people, my age, without you know, actual problems with the blood..." 8F*

*"...it got me down first of all, it, bit of a shock, 'cause I wouldn't expect it to be a clot, I thought it was just a nasty bruise..." 9M*

1  
2  
3 Patients also expressed emotional distress in relation to not knowing the cause  
4 of their major PE or why they have experienced a decrease in physical fitness.  
5  
6

7  
8 *"I just couldn't understand why it had happened to me. Why me? It was*  
9 *awful not knowing what had caused it."* 2F  
10  
11

12  
13 In a number of cases, patients described feelings of worry and anxiety and  
14 consequent restriction or withdrawal from physical activities due to having  
15 become 'hyper-vigilant' to bodily sensations due to uncertainties about not  
16 knowing or understanding the meaning or implications behind experiencing  
17 such bodily sensations. Patients referred to discerning bodily sensations such as  
18 breathlessness or increased heart rate, often experienced with attempts at  
19 physical activity as being similar to their original symptoms and thus interpreted  
20 to indicate a negative, catastrophic outcome (e.g. recurrence or death from major  
21 PE).  
22  
23  
24  
25  
26  
27  
28  
29

30 *"... frightened if I'm honest, because...um...I wasn't sure what it was, I*  
31 *thought it was pleurisy so, initially I just thought well, it's pleurisy, it's*  
32 *painful, and it's fine, but once I knew it was blood clots, and the Consultant*  
33 *said, sometimes these damage the outside of the heart, I was scared, in fact,*  
34 *when the Consultant left, um, and I was on my own, I got a bit tearful, it*  
35 *was, I thought, well, this is life threatening."* 7M  
36  
37  
38  
39  
40  
41

42 *"I slightly panicked a bit later on when I sort of recovered, because I had felt*  
43 *very dizzy at that point, the nurse explained to me that my heart rate*  
44 *dropped to thirty and that's when I first probably realized you know, the*  
45 *potential outcome could be, very bad."* 6M  
46  
47  
48  
49  
50  
51

### 52 **Loss of self**

53  
54 Participants reported feelings of losing who they were, in particular with respect  
55 to no longer undertaking activities or behaviors that they previously identified as  
56 part of their core characteristics. The loss of self was considered more profound  
57  
58  
59  
60

owing to the suddenness of the PE event from which they attributed the loss of self to originate. For some, the loss of self appeared to originate from the physical restrictions they found imposed upon them from the PE itself. For others the changes in activities resulted from being anticoagulated, thus needing to avoid activities that had a high risk of trauma and bleeding.

*"I just find it difficult to comprehend that overnight I went from being fit, doing most things that people are able to do at my age without any problems at all, and in the twinkling of an eye reduced to not even being able to walk even ten yards across a ward to the toilet. I just don't see myself as fit anymore."* 4M

*"Since I've had this he hasn't mentioned taking over the business because he's seen such a change in me that he knows that I'm not capable of doing it. And deep down, that hurts me more than anything".* 3F

*"It hurts me to think that they don't see me as the fun, active mum I used to be, and I think they do resent me for it."* 3F

*"...it's had a bit of a deeper effect on me really, because, I've had to stop all the things I used to do, I was really into rugby, which is obviously quite a contact sport, um... surfing, um, and karate which is full contact as well, and my whole lifestyle was, sort of a, so I've had to stop everything..."* 6M

*"...I was told I can't really drink much and that's all I used to do on a Saturday after rugby and, so socially I'm not as active as I was..."* 6M

*"I hate it really..., really upsetting really 'cause I can't do anything I used to do, like doing."* 9M

### **Change in focus or direction**

All participants reported their experience of PE to have affected how they viewed and approached the future. Some adopted a fatalistic or nihilistic approach, suggesting they no longer felt in control of their destiny, which was at the mercy of future thrombotic events.

1  
2  
3 *"It doesn't give you a very good outlook does it? I try not to think ten years*  
4 *time, twenty years time you know what I mean?" 3F*  
5  
6

7  
8 *"Ninety eight percent of the time I'm very fatalistic about it all now....I've*  
9 *kind of accepted my lot." 5M*  
10  
11

12  
13 Many considered their experience as an opportunity to re-evaluate their lives  
14 and take positive steps to optimize their future. Some described a newfound  
15 appreciation of what was important to them, whilst others had made changes to  
16 their careers or their lifestyles.  
17  
18  
19

20  
21  
22 *"But then I guess I'm lucky to still be alive. You know I'm still here....I've just*  
23 *got to accept that as much as it hurts, I want to see my girls grow up...So*  
24 *I've just got to be positive and grateful for what I have got. And thinking*  
25 *like that has helped me to go on with my life." 3F*  
26  
27  
28

29  
30 *"I've gone into care work now which is great because I've got the strength to*  
31 *help people and its nice that I can relate to people who've had strokes and*  
32 *such because I think 'I ain't half lucky', you I feel so blessed and lucky that*  
33 *I'm still here to help people you know. So for me its made me have a sort of*  
34 *different outlook on life but sort of more positive." 3F*  
35  
36  
37  
38

39  
40 *"But, um, I do consider things to be a bit more, \*pause\* cherishing, have*  
41 *some cherished moments \*laughs\* especially straight after...now, I just feel*  
42 *like I'm back to normal...but I'm trying to make the most of, what I've*  
43 *got...which isn't a lot..." 8F*  
44  
45  
46  
47  
48

49  
50 *"I've um, looked at what do I need to do to improve my chances of, um, living*  
51 *a healthy lifestyle...so I've been now to see a nutritionist for healthy*  
52 *eating...I don't drink um, more than 2-3 units a day, and I'll have a couple of*  
53 *days off which I wouldn't have done before, and I'm trying to look at my*  
54 *food intake and what I'm eating, to try to lose weight... so I'm just trying to*  
55  
56  
57  
58  
59  
60

1  
2  
3 *be more sensible about my eating and drinking habits and being more*  
4 *focused on my exercise.” 7M*  
5  
6  
7

### 8 **Avoidance behaviours**

9

10  
11 Participants frequently described a modification in their day-to-day behaviours.  
12 They avoided any activity they perceived could precipitate a further PE and  
13 those receiving anticoagulation avoided anything that might increase their risk  
14 of bleeding complications. Modification of physical activity and exertion was the  
15 commonest behavior change in order to minimise exposure to potential physical  
16 trauma.  
17  
18  
19  
20  
21

22  
23 *“I was quite outgoing and robust...feel like I’ve gone more timid...I don’t get*  
24 *involved in anything...I’m afraid I’ll bang my head...I just really, really*  
25 *refrain from doing much.” 6M*  
26  
27  
28

29  
30 *“...I’m certainly very careful, I don’t get any cuts that you know, are*  
31 *unnecessarily from silly little things, so you’d be careful around being um,*  
32 *uh...when I was out on the road bike cycling or you know, sometimes I*  
33 *wouldn’t put my helmet on, now I always put my helmet on, so it’s just made*  
34 *me be a bit more careful around what I’m doing incase I you know, bleed or*  
35 *um, or something happens from that.” M7*  
36  
37  
38  
39  
40  
41  
42  
43

### 44 **Major theme 2: Post Traumatic Stress Disorder**

45

46  
47 Post traumatic stress disorder (PTSD) is characterized by a group of symptoms  
48 including flashbacks, avoidance behaviours, numbing of memories and hyper  
49 arousal which continue beyond a month after the traumatic event(31, 32).  
50 Almost all participants volunteered symptoms suggestive of PTSD, some  
51 describing symptom clusters which suggested a significant degree of functional  
52 disability due to the condition.  
53  
54  
55  
56  
57  
58  
59  
60

### **Flashbacks**

Flashbacks to, and memories of, the initial PE experience were common. Ongoing anticoagulation, be it self injecting low molecular weight heparin (LMWH), taking oral anticoagulants or having blood tests acted as profound triggers to flashbacks and reminders of their perceived “near death experience”.

*“All these sorts of things; its brought back to you all the time even when your not consciously thinking about it, its brought back to you all the time.”5M*

*“And then I reverted to injecting myself and then that then carried on but it was just a constant reminder of what had happened, even now, although its become routine, it just makes me think how close I came to almost dying, to how ill I was.”4M*

*“For instance it might be time to my injection and it’ll just all come back to me. The worries, will it happen again, will I be so lucky next time?”2F*

Whilst some reported the content of the flashback episode to be short-lived, others experienced a more protracted experience reliving the entire distressing episode.

*I’ll go through the whole thing. Like it will run from start to finish like a movie. Its very hard to switch off once I’ve started thinking about it, it has to play out if you like”2F*

### **Numbing of memories**

Several participants recalled a blunting of their emotion during the experience with some disassociation with reality.

1  
2  
3  
4  
5  
6  
7  
8  
9  
10  
11  
12  
13  
14  
15  
16  
17  
18  
19  
20  
21  
22  
23  
24  
25  
26  
27  
28  
29  
30  
31  
32  
33  
34  
35  
36  
37  
38  
39  
40  
41  
42  
43  
44  
45  
46  
47  
48  
49  
50  
51  
52  
53  
54  
55  
56  
57  
58  
59  
60

“...some sense which it doesn't seem real...” 5M

“...seems like, as if it kind of wasn't real...” 8F

Others described the use of denial, be it conscious or sub conscious in dealing with the trauma of the experience.

“...for a long time I was just, well, in denial I think, “oh no, I'll be alright, I'll be alright...”6M

“But when they (thoughts/feelings associated with major PE) come to the surface, well I have puzzles and things which I do to block it out...I don't want to think about it so my puzzles are one way of avoiding thinking about it for me.” 1F

### **Hyper vigilance**

Patients reported increased increased vigilance and awareness of anxiety any symptoms they felt could be associated with a recurrent PE. Such awareness was associated with increased anxiety and catastrophising thought processes.

“In the beginning I was very very very weary, very scared. I would only have to get a sort of sign or niggle in my chest and I would start to panic thinking that it was going to happen again or I'd end up in a heap on the floor”2F

“It was always on my mind. It made me more conscious of making sure that if I was on my own somewhere people knew....I taught my daughter nannies house number...just in case something did happen. It just makes me angry to think that no-one can tell me I won't have another one and now I have to live my life by this”2F

### **Major theme 3: Support needs**

1  
2  
3 All participants described needing a significant degree of support and it was  
4 evident that the support needed was ongoing but differed over time. The nature  
5 of support required often required clinical and or specialist knowledge, and  
6 appeared to be an unmet need which could only be met by appropriate  
7 healthcare professionals.  
8  
9  
10

### 11 Information

12  
13 During the initial stages of diagnosis and treatment, participants required  
14 considerable information regarding their condition, their prognosis and long  
15 term treatment. Many described their care as focusing on the biomedical with  
16 little attention given to support through information giving or psychological  
17 care.  
18  
19  
20  
21  
22

23 *"None of them actually said anything to make me understand, it was just a*  
24 *case of 'you've had these clots, they've gone to your lungs', none of the rest of*  
25 *what else could have happened before they got to the lungs registered or*  
26 *how serious it was when it got to there."*5F  
27  
28  
29  
30  
31

32 Where information was not freely available, participants would seek answers on  
33 the Internet. This form of information gathering, without access to additional  
34 support or proved more distressing than helpful.  
35  
36  
37

38 *"Yeah after looking on the internet I did the whole sitting, crying, rocking*  
39 *thing thinking 'oh me god' and then told myself off for looking to be honest*  
40 *because finding out that way with no-one there to kind of go through it with*  
41 *me knocked me for six."* M5  
42  
43  
44  
45  
46

47 Participants were clear on the degree of information they required: frequently  
48 describing the need to understand why this had happened to them and what  
49 they should/ should not do from then on to rehabilitate effectively.  
50  
51  
52

53 *"It causes me quite a lot of concern doing things...and I'm scared of doing*  
54 *them in case it happens again....I just get so annoyed that's that the thing*  
55 *that will stop me, because I worry that if I get a bit out of breath or feel my*  
56  
57  
58  
59  
60



1  
2  
3 *heart going that I'll end up in a heap on the floor basically...but I wouldn't*  
4 *worry as much if I just knew what was causing it, or someone could tell me*  
5 *how much I can push myself"*  
6  
7  
8

9  
10 *"It just annoys me because I just can't achieve what I used to achieve and I*  
11 *just haven't got the answers as to why. Why can't I? What's stopping me?*  
12 *What's making that happen to me? If I had the answers I'd be alright with*  
13 *it. I'd get on with it". 3F*  
14  
15  
16

17  
18 When basic information was provided, including realistic outcomes, participants  
19 were able to make more sense of their lives and symptoms, describing a more  
20 positive rehabilitation.  
21  
22  
23

24  
25 *"So I asked if he could provide me with some information about what was*  
26 *the likely cause and some information about what I could expect or hope for*  
27 *really in recovering for me which was quite a fortuitous bit of information*  
28 *that I got which encouraged me a bit but it sort of did seem possible that by*  
29 *just keeping on with the blood thinning that these could eventually get re-*  
30 *absorbed and I could get back to sort of normal activity." 4M*  
31  
32  
33  
34  
35

### 36 37 **Empathy**

38 Participants considered themselves to have experienced a narrow escape from  
39 death and as described before expressed considerable psychological distress  
40 after the event. They did not feel that healthcare professionals fully appreciated  
41 the seriousness of their experience and thus did not understand the distress  
42 associated with symptoms suggestive of VTE recurrence.  
43  
44  
45  
46  
47

48  
49 *"But I cant remember thinking that you know, I might have died, that my*  
50 *daughter might not have had her mum, and no one helping to make sure*  
51 *that I understood what was going on, or what was wrong with me, or how*  
52 *this would effect my life. I just remember feeling quite resentful of the*  
53 *medical staff." 2F*  
54  
55  
56  
57  
58  
59  
60

1  
2  
3 *“And I did start to panic then and think well you know if I had a pain in the*  
4 *chest again I could be telling someone what I think it is but would they*  
5 *actually take my word for it kind of thing. And I did actually feel that it*  
6 *wasn't really taken too seriously. I mean the fact that it could of killed me*  
7 *and they had a very blasé approach toward it.” 2F*  
8  
9  
10  
11

### 12 **Access to support**

13  
14  
15  
16  
17 Whilst there was a significant requirement for information and support from  
18 healthcare professionals, some participants also identified the potential benefits  
19 of self-help/ support groups. The opportunity to meet other people who  
20 understood their experiences and associated feelings was considered a positive  
21 thing and there was a belief that several unmet needs could be provided by  
22 fellow PE patients.  
23  
24  
25  
26  
27

28 *“I would have loved, and still would like some sort of group thing or support*  
29 *to be available to help me come to terms with what's happened to*  
30 *me...somewhere where somebody could have explained 'yeah its normal to*  
31 *feel like that' etcetera, you know like maybe other people who had been*  
32 *through the same thing. I don't think I would of felt so on my own then....*  
33 *Just to have this level of conversation with somebody back then would have*  
34 *helped massively. To help me process it all through, because it was very 'off*  
35 *you go' and that was that”. 5M*  
36  
37  
38  
39  
40  
41  
42

### 43 **Discussion**

44  
45  
46 Venous thromboembolism is a common medical condition, which may cause a  
47 spectrum of physical symptoms. In its most severe form, major symptomatic  
48 pulmonary emboli may lead to cardiovascular compromise and even death.  
49 Whilst the long-term complications such as post thrombotic syndrome and  
50 pulmonary hypertension are well recognized, little has been known about the  
51 psychological impact of symptomatic VTE. In our study of previously healthy  
52 adults who experienced a symptomatic pulmonary embolus we have identified  
53  
54  
55  
56  
57  
58  
59  
60

1  
2  
3 that the psychological consequences of experiencing symptomatic VTE are  
4 considerable. The development of VTE is considered a life-changing event with  
5 some patients feeling a loss of identity and role in life. More concerning appears  
6 to be a profound and ongoing collection of symptoms suggestive of the  
7 development of PTSD. This is the first time that PTSD has been identified as a  
8 consequence of VTE. To some extent these findings shouldn't come as a surprise  
9 since features that contribute to the development of PTSD are common in VTE  
10 patients; patients of previous good health experience a traumatic life threatening  
11 event and the face a future of uncertainty regarding recurrence. However, these  
12 findings raise the possibility that as healthcare professionals we are failing to  
13 recognise the psychological needs of our patients.  
14  
15  
16  
17  
18  
19  
20  
21  
22

23 There are several limitations to this study: the number of participants is small  
24 and although the numbers are appropriate for such qualitative methodology, a  
25 larger study is clearly needed to identify the true prevalence of PTSD using a  
26 validated screening tool. There is also a possibility of selection bias since all  
27 participants interviewed had required admission to hospital for their  
28 symptomatic PE and as such were likely to be those with more severe symptoms  
29 and thus a more traumatic experience. Whilst the likelihood of bias is  
30 acknowledged, it shouldn't invalidate the findings in the context of those with  
31 the most significant VTE episodes. It would be presumptive to assume that all  
32 VTE patients experienced PTSD in the same way that one acknowledges that  
33 PTSD occurs in some but not all myocardial infarction patients. It does, however,  
34 highlight that of those developing VTE, a subgroup may experience significant  
35 psychological sequelae and it would make clinical sense to identify those at  
36 greatest risk and arrange appropriate support. At present it is not possible to  
37 identify whether the development of PTSD is directly related to the VTE  
38 experience or whether there are particular pre morbid characteristics that  
39 predispose people. It is of interest to note that participants felt they received  
40 limited information and would have liked more opportunities to understand  
41 their condition from an appropriately trained professional rather than seek  
42 information themselves on the internet.  
43  
44  
45  
46  
47  
48  
49  
50  
51  
52  
53  
54  
55  
56  
57  
58  
59  
60

1  
2  
3 Finally this study highlights several areas of opportunity for healthcare  
4 professionals to deliver support to patients post VTE be it through information  
5 giving, empathy or identifying psychological distress early on. It is possible early  
6 intervention may reduce the development of long-term psychological distress  
7 and the ongoing challenges it brings.  
8  
9  
10

11  
12 SN affirms that the manuscript is an honest, accurate, and transparent account of  
13 the study being reported; that no important aspects of the study have been  
14 omitted; and that any discrepancies from the study as planned (and, if relevant,  
15 registered) have been explained.  
16  
17  
18  
19  
20  
21  
22  
23  
24  
25  
26  
27  
28  
29  
30  
31  
32  
33  
34  
35  
36  
37  
38  
39  
40  
41  
42  
43  
44  
45  
46  
47  
48  
49  
50  
51  
52  
53  
54  
55  
56  
57  
58  
59  
60

## References

1. Silverstein MD, Heit JA, Mohr DN, et al. Trends in the incidence of deep vein thrombosis and pulmonary embolism: a 25-year population-based study. *Arch Intern Med.* 1998 Mar 23;158(6):585-93. PubMed PMID: 9521222. Epub 1998/04/01. eng.
2. Prandoni P, Lensing AW, Cogo A, et al. The long-term clinical course of acute deep venous thrombosis. *Ann Intern Med.* 1996 Jul 1;125(1):1-7. PubMed PMID: 8644983. Epub 1996/07/01. eng.
3. Yamaki T, Hamahata A, Soejima K, et al. Factors predicting development of post-thrombotic syndrome in patients with a first episode of deep vein thrombosis: preliminary report. *Eur J Vasc Endovasc Surg.* 2011 Jan;41(1):126-33. PubMed PMID: 21112226. Epub 2010/11/30. eng.
4. Mohr DN, Silverstein MD, Heit JA, et al. The venous stasis syndrome after deep venous thrombosis or pulmonary embolism: a population-based study. *Mayo Clin Proc.* 2000 Dec;75(12):1249-56. PubMed PMID: 11126832. Epub 2000/12/29. eng.
5. Kahn SR, Shrier I, Julian JA, et al. Determinants and time course of the postthrombotic syndrome after acute deep venous thrombosis. *Ann Intern Med.* 2008 Nov 18;149(10):698-707. PubMed PMID: 19017588. Epub 2008/11/20. eng.
6. Pengo V, Lensing AW, Prins MH, et al. Incidence of chronic thromboembolic pulmonary hypertension after pulmonary embolism. *N Engl J Med.* 2004 May 27;350(22):2257-64. PubMed PMID: 15163775. Epub 2004/05/28. eng.
7. Becattini C, Agnelli G, Pesavento R, et al. Incidence of chronic thromboembolic pulmonary hypertension after a first episode of pulmonary embolism. *Chest.* 2006 Jul;130(1):172-5. PubMed PMID: 16840398. Epub 2006/07/15. eng.
8. Poli D, Grifoni E, Antonucci E, et al. Incidence of recurrent venous thromboembolism and of chronic thromboembolic pulmonary hypertension in patients after a first episode of pulmonary embolism. *J Thromb Thrombolysis.* 2010 Oct;30(3):294-9. PubMed PMID: 20157841. Epub 2010/02/17. eng.
9. Vedantham S. Valvular dysfunction and venous obstruction in the post-thrombotic syndrome. *Thromb Res.* 2009;123 Suppl 4:S62-5. PubMed PMID: 19303507. Epub 2009/06/13. eng.
10. Stein E, Ramakrishna H, Augoustides JG. Recent advances in chronic thromboembolic pulmonary hypertension. *J Cardiothorac Vasc Anesth.* 2011 Aug;25(4):744-8. PubMed PMID: 21620730. Epub 2011/05/31. eng.
11. Kim NH. Assessment of operability in chronic thromboembolic pulmonary hypertension. *Proc Am Thorac Soc.* 2006 Sep;3(7):584-8. PubMed PMID: 16963538. Epub 2006/09/12. eng.
12. Riedel M, Stanek V, Widimsky J, et al. Longterm follow-up of patients with pulmonary thromboembolism. Late prognosis and evolution of hemodynamic and respiratory data. *Chest.* 1982 Feb;81(2):151-8. PubMed PMID: 7056079. Epub 1982/02/01. eng.

13. Kahn SR, Hirsch A, Shrier I. Effect of postthrombotic syndrome on health-related quality of life after deep venous thrombosis. *Arch Intern Med.* 2002 May 27;162(10):1144-8. PubMed PMID: 12020185. Epub 2002/05/22. eng.
14. Kahn SR, Shbaklo H, Lamping DL, et al. Determinants of health-related quality of life during the 2 years following deep vein thrombosis. *J Thromb Haemost.* 2008 Jul;6(7):1105-12. PubMed PMID: 18466316. Epub 2008/05/10. eng.
15. Lerman C, Croyle R. Psychological issues in genetic testing for breast cancer susceptibility. *Arch Intern Med.* 1994 Mar 28;154(6):609-16. PubMed PMID: 8129493. Epub 1994/03/28. eng.
16. Tercyak KP, Johnson SB, Roberts SF, et al. Psychological response to prenatal genetic counseling and amniocentesis. *Patient Educ Couns.* 2001 Apr;43(1):73-84. PubMed PMID: 11311841. Epub 2001/04/20. eng.
17. Tercyak KP, Lerman C, Peshkin BN, et al. Effects of coping style and BRCA1 and BRCA2 test results on anxiety among women participating in genetic counseling and testing for breast and ovarian cancer risk. *Health Psychol.* 2001 May;20(3):217-22. PubMed PMID: 11403219. Epub 2001/06/14. eng.
18. Morrison V, Bennett P. *An introduction to health psychology.* 2nd ed. ed. Harlow: Pearson Prentice Hall; 2009.
19. Zabora J, BrintzenhofeSzoc K, Curbow B, et al. The prevalence of psychological distress by cancer site. *Psychooncology.* 2001 Jan-Feb;10(1):19-28. PubMed PMID: 11180574. Epub 2001/02/17. eng.
20. Kangas M, Henry JL, Bryant RA. Posttraumatic stress disorder following cancer. A conceptual and empirical review. *Clin Psychol Rev.* 2002 May;22(4):499-524. PubMed PMID: 12094509. Epub 2002/07/04. eng.
21. Shalev AY. Post-traumatic stress disorder: a biopsychological perspective. *Isr J Psychiatry Relat Sci.* 1993;30(2):102-9. PubMed PMID: 8270384. Epub 1993/01/01. eng.
22. Bennett P, Brooke S. Intrusive memories, post-traumatic stress disorder and myocardial infarction. *Br J Clin Psychol.* 1999 Nov;38 ( Pt 4):411-6. PubMed PMID: 10590829. Epub 1999/12/11. eng.
23. Tedstone JE, Tarrier N. Posttraumatic stress disorder following medical illness and treatment. *Clin Psychol Rev.* 2003 May;23(3):409-48. PubMed PMID: 12729679. Epub 2003/05/06. eng.
24. Alloy LB, Abramson LY. Learned helplessness, depression, and the illusion of control. *J Pers Soc Psychol.* 1982 Jun;42(6):1114-26. PubMed PMID: 7108740. Epub 1982/06/01. eng.
25. Ireys HT, Werthamer-Larsson LA, Kolodner KB, et al. Mental health of young adults with chronic illness: the mediating effect of perceived impact. *J Pediatr Psychol.* 1994 Apr;19(2):205-22. PubMed PMID: 8051603. Epub 1994/04/01. eng.
26. Moores LK. Medical uncertainty: informing decision making for patients with acute pulmonary embolism. *Chest.* 2009 Oct;136(4):952-3. PubMed PMID: 19809038. Epub 2009/10/08. eng.
27. Noble SI, Finlay IG. Is long-term low-molecular-weight heparin acceptable to palliative care patients in the treatment of cancer related venous thromboembolism? A qualitative study. *Palliat Med.* 2005 Apr;19(3):197-201. PubMed PMID: 15920933. Epub 2005/06/01. eng.

- 1  
2  
3 28. Noble SI, Nelson A, Finlay IG. Factors influencing hospice  
4 thromboprophylaxis policy: a qualitative study. *Palliat Med.* 2008 Oct;22(7):808-  
5 13. PubMed PMID: 18772209. Epub 2008/09/06. eng.  
6  
7 29. Noble SI, Nelson A, Turner C, et al. Acceptability of low molecular weight  
8 heparin thromboprophylaxis for inpatients receiving palliative care: qualitative  
9 study. *Bmj.* 2006 Mar 11;332(7541):577-80. PubMed PMID: 16459340. Pubmed  
10 Central PMCID: 1397778. Epub 2006/02/07. eng.  
11 30. Smith JA, Larkin MH, Flowers P. Interpretative phenomenological analysis  
12 : theory, method and research. Los Angeles ; London: SAGE; 2009.  
13 31. The ICD-10 classification of mental and behavioural disorders : diagnostic  
14 criteria for research: WHO; 1993.  
15 32. Diagnostic and statistical manual of mental disorders : DSM-5. Fifth  
16 edition. ed.  
17  
18  
19  
20  
21  
22  
23  
24  
25  
26  
27  
28  
29  
30  
31  
32  
33  
34  
35  
36  
37  
38  
39  
40  
41  
42  
43  
44  
45  
46  
47  
48  
49  
50  
51  
52  
53  
54  
55  
56  
57  
58  
59  
60

1  
2  
3  
4  
5  
6  
7  
8  
9  
10  
11  
12  
13  
14  
15  
16  
17  
18  
19  
20  
21  
22  
23  
24  
25  
26  
27  
28  
29  
30  
31  
32  
33  
34  
35  
36  
37  
38  
39  
40  
41  
42  
43  
44  
45  
46  
47  
48  
49  
50  
51  
52  
53  
54  
55  
56  
57  
58  
59  
60

**Figure 1: Major themes and associated sub themes**

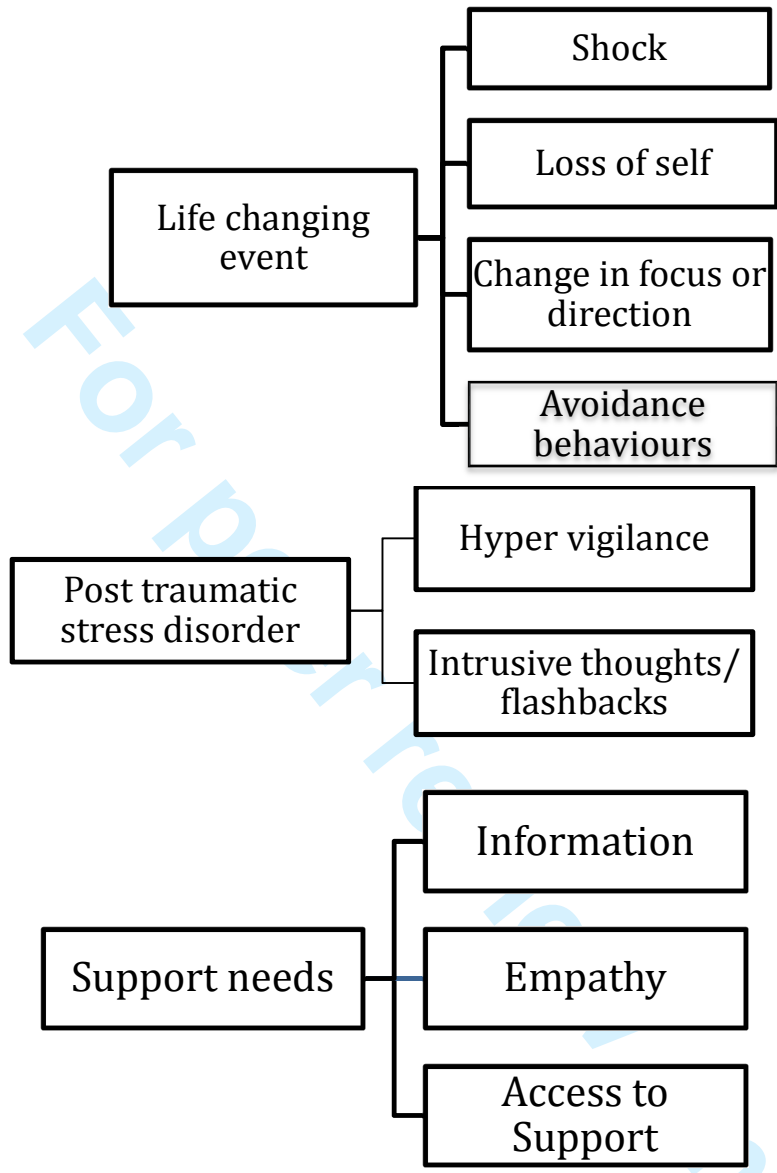



## COREC CHECKLIST

All applicable items in the checklist have been addressed within the manuscript. These have been outlined in the comments section of the table below.

| No                                                 | Item                                     | Guide questions                                                                                                                                  | Comments and page                                                   |
|----------------------------------------------------|------------------------------------------|--------------------------------------------------------------------------------------------------------------------------------------------------|---------------------------------------------------------------------|
| <b>Domain 1:<br/>Research team and reflexivity</b> |                                          |                                                                                                                                                  |                                                                     |
| Personal Characteristics                           |                                          |                                                                                                                                                  |                                                                     |
| 1.                                                 | Interviewer/facilitator                  | Which author/s conducted the interview or focus group?                                                                                           | RL and JW                                                           |
| 2.                                                 | Credentials                              | What were the researcher's credentials? <i>E.g. PhD, MD</i>                                                                                      | MSc students                                                        |
| 3.                                                 | Occupation                               | What was their occupation at the time of the study?                                                                                              | MSc students                                                        |
| 4.                                                 | Gender                                   | Was the researcher male or female?                                                                                                               | Female                                                              |
| 5.                                                 | Experience and training                  | What experience or training did the researcher have?                                                                                             | Experienced clinical psychologists trained in qualitative research. |
| Relationship with participants                     |                                          |                                                                                                                                                  |                                                                     |
| 6.                                                 | Relationship established                 | Was a relationship established prior to study commencement?                                                                                      | No prior relationship                                               |
| 7.                                                 | Participant knowledge of the interviewer | What did the participants know about the researcher? <i>e.g. personal goals, reasons for doing the research</i>                                  | No prior knowledge                                                  |
| 8.                                                 | Interviewer characteristics              | What characteristics were reported about the interviewer/facilitator? <i>e.g. Bias, assumptions, reasons and interests in the research topic</i> | No stated previous interest in VTE management                       |

|                                   |                                       |                                                                                                                                                                 |                                          |
|-----------------------------------|---------------------------------------|-----------------------------------------------------------------------------------------------------------------------------------------------------------------|------------------------------------------|
| <b>Domain 2:<br/>study design</b> |                                       |                                                                                                                                                                 |                                          |
| Theoretical framework             |                                       |                                                                                                                                                                 |                                          |
| 9.                                | Methodological orientation and Theory | What methodological orientation was stated to underpin the study? <i>e.g. grounded theory, discourse analysis, ethnography, phenomenology, content analysis</i> | Interpretative phenomenological analysis |
| Participant selection             |                                       |                                                                                                                                                                 |                                          |
| 10.                               | Sampling                              | How were participants selected? <i>e.g. purposive, convenience, consecutive, snowball</i>                                                                       | Sequential screening                     |
| 11.                               | Method of approach                    | How were participants approached? <i>e.g. face-to-face, telephone, mail, email</i>                                                                              | Eleven                                   |
| 12.                               | Sample size                           | How many participants were in the study?                                                                                                                        | Nine                                     |
| 13.                               | Non-participation                     | How many people refused to participate or dropped out? Reasons?                                                                                                 | Two. No reasons sought                   |
| Setting                           |                                       |                                                                                                                                                                 |                                          |
| 14.                               | Setting of data collection            | Where was the data collected? <i>e.g. home, clinic, workplace</i>                                                                                               | Clinic                                   |
| 15.                               | Presence of non-participants          | Was anyone else present besides the participants and researchers?                                                                                               | No                                       |
| 16.                               | Description of sample                 | What are the important characteristics of the sample? <i>e.g. demographic data, date</i>                                                                        | Given in table 1                         |
| Data collection                   |                                       |                                                                                                                                                                 |                                          |
| 17.                               | Interview                             | Were questions,                                                                                                                                                 | Prompt questions                         |

|                                         |                                |                                                                          |                                                           |
|-----------------------------------------|--------------------------------|--------------------------------------------------------------------------|-----------------------------------------------------------|
|                                         | guide                          | prompts, guides provided by the authors? Was it pilot tested?            | following pilot testing                                   |
| 18.                                     | Repeat interviews              | Were repeat interviews carried out? If yes, how many?                    | No                                                        |
| 19.                                     | Audio/visual recording         | Did the research use audio or visual recording to collect the data?      | Digital audiorecording                                    |
| 20.                                     | Field notes                    | Were field notes made during and/or after the interview or focus group?  | Field notes were taken                                    |
| 21.                                     | Duration                       | What was the duration of the interviews or focus group?                  | Thirty minutes                                            |
| 22.                                     | Data saturation                | Was data saturation discussed?                                           | No since we used interpretative phenomenological analysis |
| 23.                                     | Transcripts returned           | Were transcripts returned to participants for comment and/or correction? | No                                                        |
| <b>Domain 3: analysis and findingsz</b> |                                |                                                                          |                                                           |
| Data analysis                           |                                |                                                                          |                                                           |
| 24.                                     | Number of data coders          | How many data coders coded the data?                                     | Two                                                       |
| 25.                                     | Description of the coding tree | Did authors provide a description of the coding tree?                    | Yes                                                       |
| 26.                                     | Derivation of themes           | Were themes identified in advance or derived from the data?              | Derived from the data                                     |
| 27.                                     | Software                       | What software, if applicable, was used to manage the data?               | Not applicable                                            |
| 28.                                     | Participant checking           | Did participants provide feedback on the findings?                       | No                                                        |
| Reporting                               |                                |                                                                          |                                                           |
| 29.                                     | Quotations presented           | Were participant quotations                                              | Yes                                                       |

|     |                              |                                                                                                              |     |
|-----|------------------------------|--------------------------------------------------------------------------------------------------------------|-----|
|     |                              | presented to illustrate the themes / findings? Was each quotation identified? e.g. <i>participant number</i> |     |
| 30. | Data and findings consistent | Was there consistency between the data presented and the findings?                                           | Yes |
| 31. | Clarity of major themes      | Were major themes clearly presented in the findings?                                                         | Yes |
| 32. | Clarity of minor themes      | Is there a description of diverse cases or discussion of minor themes?                                       | Yes |

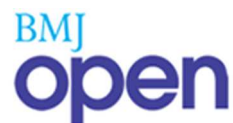

**The long-term psychological consequences of symptomatic pulmonary embolism: a qualitative study.**

|                                 |                                                                                                                                                                                                                                                                                                          |
|---------------------------------|----------------------------------------------------------------------------------------------------------------------------------------------------------------------------------------------------------------------------------------------------------------------------------------------------------|
| Journal:                        | <i>BMJ Open</i>                                                                                                                                                                                                                                                                                          |
| Manuscript ID:                  | bmjopen-2013-004561.R1                                                                                                                                                                                                                                                                                   |
| Article Type:                   | Research                                                                                                                                                                                                                                                                                                 |
| Date Submitted by the Author:   | 04-Mar-2014                                                                                                                                                                                                                                                                                              |
| Complete List of Authors:       | Noble, Simon; Cardiff University, Palliative Medicine<br>Lewis, Rhian; Swansea University, Clinical Psychology<br>Whithers, Jodie; Swansea University, Clinical Psychology<br>Lewis, Sarah; Aneurin Bevan University Health Board, Haematology<br>Bennett, Paul; Swansea University, Clinical Psychology |
| <b>Primary Subject Heading</b>: | Qualitative research                                                                                                                                                                                                                                                                                     |
| Secondary Subject Heading:      | Patient-centred medicine, Mental health, Haematology (incl blood transfusion), Communication                                                                                                                                                                                                             |
| Keywords:                       | Thromboembolism < CARDIOLOGY, Anticoagulation < HAEMATOLOGY, Anxiety disorders < PSYCHIATRY, QUALITATIVE RESEARCH, VASCULAR MEDICINE                                                                                                                                                                     |
|                                 |                                                                                                                                                                                                                                                                                                          |

SCHOLARONE™  
Manuscripts

1  
2  
3  
4 **The long-term psychological consequences of symptomatic pulmonary**  
5 **embolism: a qualitative study.**  
6  
7

8  
9 Simon Noble, Marie Curie Palliative Care Research Group, Cardiff University,  
10 Cardiff, Wales, UK

11  
12 Rhian Lewis, Department of Clinical Psychology, Swansea University, Swansea,  
13 Wales, UK

14  
15 Jodie Whithers, Department of Clinical Psychology, Swansea University, Swansea,  
16 Wales, UK

17  
18 Sarah Lewis, Department of Haematology, Nevill Hall Hospital, Abergavenny,  
19 Wales, UK

20  
21 Paul Bennett, Department of Clinical Psychology, Swansea University, Swansea,  
22 Wales, UK

23  
24  
25  
26  
27  
28 Keywords: Thromboembolism, Anticoagulation, Anxiety disorders, Qualitative  
29 research, Vascular medicine

30  
31 Word count 4625  
32  
33  
34  
35

36 Corresponding author:

37 Simon Noble,

38 Marie Curie Palliative Medicine Research Group

39 6<sup>th</sup> Floor

40 Neuadd Meirionyd

41 Cardiff University

42 Heath Park Campus

43 CF14 4YS

44 Wales, UK

45 Telephone: 02920687500

46 Fax: 02920687501  
47  
48  
49  
50  
51  
52  
53  
54  
55  
56  
57  
58  
59  
60

## Objective

To explore the psychological consequences of experiencing symptomatic pulmonary embolism.

## Design

Qualitative interview based study using interpretative phenomenological analysis.

## Setting

Outpatients who attended an anticoagulation clinic in a district general hospital.

## Participants

Patients attending an anticoagulation clinic following hospital admission for symptomatic pulmonary embolism were approached to participate. A total of nine (4 female, 5 male) out of 11 patients approached, agreed to be interviewed. Participants were aged between 26 and 72 years and had experienced a PE between 9 and 60 months previously (median=26 months, mean=24 months).

## Intervention

Audiotaped semi structured qualitative interviews were undertaken to explore participants experiences of having a PE and how it had affected their lives since. Data was transcribed and analysed using interpretative phenomenological analysis to identify emergent themes.

## Results

Three major themes with associated sub themes were identified. Participants described having a PE as a life changing experience comprising of initial shock, followed by feeling of loss of self, life changing decisions and behavior modification. Features of post-traumatic stress disorder (PTSD) were described with flashbacks, hypervigilance and intrusive thoughts being most prevalent. Participants identified several areas of support needed for such patients including easier access to support through information giving and emotional support.

## Conclusion

The long-term consequences of VTE go beyond the physical alone. Patients describe experiencing symptomatic PE to be a life changing distressing event leading to behaviour modification and in some PTSD. It is likely that earlier psychological intervention may reduce such long-term sequelae.

1  
2  
3  
4  
5  
6 Strengths of this study

- 7 • This is the first time the psychological consequences of symptomatic
- 8 pulmonary embolism have been explored.
- 9 • This paper highlights an unmet clinical need
- 10 • This paper is of relevance to a breadth of health professionals
- 11 • This paper gives patients a voice

12  
13 Weaknesses of the study

- 14 • The patients were recruited from a single site
  - 15 • Whilst appropriate in number for interpretative phenomenological
  - 16 analysis, the number of participants are small
  - 17 • The data cannot be generalised among all PE patients but highlights the
  - 18 need to explore the area further.
- 19  
20  
21  
22  
23  
24  
25  
26  
27  
28  
29  
30  
31  
32  
33  
34  
35  
36  
37  
38  
39  
40  
41  
42  
43  
44  
45  
46  
47  
48  
49  
50  
51  
52  
53  
54  
55  
56  
57  
58  
59  
60



1  
2  
3 Venous thromboembolism (VTE), clinically presenting as deep venous  
4 thrombosis (DVT) or pulmonary embolism (PE), remains a major cause of  
5 morbidity and mortality worldwide, affecting 1 in 1000 patients annually(1). The  
6 long-term physical consequences of venous thromboembolism are well  
7 documented; post-thrombotic syndrome (PTS) complicates between 25 - 50%  
8 DVT cases (2-5) and 0.4 - 4% of patients who experience PE will develop chronic  
9 thromboembolic pulmonary hypertension (CTPH)(6-8). Both these  
10 complications represent a considerable healthcare burden. Patients with PTS  
11 may not only require long-term compression stockings but also endovascular  
12 surgery if symptoms prove refractory (9). For patients who develop CTPH,  
13 medical therapy is yet to demonstrate any survival advantage leaving pulmonary  
14 thromboendarterectomy as the treatment of choice (10, 11). However only half  
15 of the patients will qualify for surgery and, of the remainder, 50% are likely to  
16 die within a year if their mean pulmonary arterial pressure exceeds 50  
17 mmHg(11, 12).

18  
19  
20  
21  
22  
23  
24  
25  
26  
27  
28 The long-term sequelae following acute VTE go beyond the physical alone. The  
29 development of PTS appears to have a negative impact on quality of life (QoL) in  
30 patients experiencing VTE (13, 14). Using the Venous Insufficiency  
31 Epidemiologic and Economic Study quality-of-life questionnaire (VEINES-QOL)  
32 and its validated subscale of 10 items on venous symptoms (VEINES-Sym),  
33 patients with PTS were shown to have significantly worse disease-specific  
34 quality-of-life scores than those without PTS (P =0.003), which worsened  
35 significantly with increasing severity of PTS (13, 14). Furthermore, the  
36 development of PTS is considered major determinant of a patients' health related  
37 QoL two years after VTE (14).

38  
39  
40  
41  
42  
43  
44  
45  
46  
47  
48  
49  
50  
51  
52  
53  
54  
55  
56  
57  
58  
59  
60  
Whilst the physical consequences of VTE have been extensively reported, the  
possible impact of VTE on patients' psychological and emotional well-being has  
received less attention. Such work has involved the use of validated QoL tools  
and has focused on the chronic consequences of deep vein thrombosis and less  
so on pulmonary emboli(15-17). Other common and potentially life-threatening  
conditions such as cancer and myocardial infarction have been researched  
extensively with clear evidence that such illnesses can result in significant

1  
2  
3 psychological morbidity. To date, no qualitative studies have investigated the  
4 impact of VTE on everyday life.

5  
6 The experience of any health related crisis is likely to result in some form of  
7 emotional distress presenting in a variety of forms including worry, anxiety,  
8 intrusive ideation and dysphoric mood, amongst other negative emotional  
9 reactions(18, 19). This appears most pronounced in medical events that pose a  
10 significant threat to life and can manifest as anxiety, anger, depression and even  
11 symptoms of post-traumatic stress disorder (PTSD) (1, 20-22). Historically PTSD  
12 has been associated with experiences of war, rape or attempted murder, where  
13 the individual is exposed to an external threat to the physical integrity of  
14 themselves or others. However research now suggests PTSD may also arise from  
15 internal physical experiences, particularly those associated with a direct or  
16 imminent threat to life(23, 24).

17  
18 Life-threatening and traumatic medical events are those most likely to cause  
19 psychological distress and behavioural changes associated with symptoms of  
20 PTSD (25). Risk for PTSD is heightened by the perception of uncertainty and/or  
21 unpredictability associated with the traumatic medical experience and worsened  
22 where the patient believes adverse outcomes to be inevitable or largely  
23 uncontrollable (26, 27). Since VTE is a potentially life threatening condition  
24 which often occurs in previously well patients, coupled with the uncertainty of  
25 recurrence it is possible that such patients are at increased risk of emotional  
26 distress, especially those who have experienced major PE(28). We therefore  
27 conducted a study to explore the psychological impact of VTE in patients who  
28 had experienced a major symptomatic PE.

## 29 30 31 32 33 34 35 36 37 38 39 40 41 42 43 44 45 46 **Methods**

47 This study was undertaken using qualitative methodologies, which have  
48 previously been used to evaluate patient experience and clinician attitudes  
49 regarding VTE management (29-31).

50  
51  
52  
53  
54 Ethical approval was obtained through the NHS South Wales Research Ethics  
55 Committee. Patients attending a dedicated haematology/ thrombosis clinic,  
56 within a district general hospital, were sequentially screened for inclusion into  
57  
58  
59  
60

1  
2  
3 the study and invited by letter to participate. All eligible patients were invited to  
4 participate.  
5  
6

7  
8 Inclusion criteria:

- 9  
10
- 11 • Aged between 18 and 70 years of age
  - 12 • Patients who had experienced a symptomatic PE which resulted in  
13 admission to hospital
  - 14 • Able to consent and participate in a 30-minute interview.  
15
- 16

17 Exclusion criteria:

- 18 • Presence of cancer
  - 19 • Known history of previous mental illness or psychological distress prior  
20 to PE  
21
- 22

23  
24 Semi-structured interviews were carried out over a twelve-month period by two  
25 female researchers (RL and JW) as part of an MSc research project under the  
26 supervision of PB and SN. Both researchers were experienced in the field of  
27 clinical psychology and trained in conducting qualitative research. Following  
28 initial pilot testing, the interviews were conducted within patients' homes and  
29 guided by a prompt list to ensure that the same issues were discussed at each  
30 interview. Researchers had no prior relationship with participants or declared  
31 clinical interest in VTE management. Data were elicited on the following:  
32  
33

- 34 • Their experience of suffering a major PE, and
  - 35 • How they felt this had affected or influenced their day-to-day lives in  
36 terms of  
37
    - 38 – Routines and activities
    - 39 – Feelings, attitudes and beliefs about themselves  
40
- 41

42  
43 To facilitate this, questions were open-ended with the use of prompts to probe  
44 further into issues, which arose as significant or meaningful to the participant.  
45 Interviews were digitally recorded and transcribed verbatim. Field notes were  
46 also taken. Interviews took approximately thirty minutes each.  
47  
48

## 49 50 51 52 53 54 55 56 **Analysis** 57 58 59 60

1  
2  
3 The analytic framework for this qualitative study was based on Interpretative  
4 Phenomenological Analysis (IPA)(32). IPA aims to explore how participants  
5 make sense of their experience but is also interpretative, recognising the  
6 researcher's conceptions, and experience, as brought to the analysis.  
7  
8

9  
10 The data was analysed in the following stages:

- 11 • The first transcript was read line-by-line and annotated with initial  
12 comments.
- 13 • Initial comments were grouped into themes.
- 14 • Connections between themes were developed until an organised master  
15 list and thematic rationale was achieved.
- 16 • New themes were tested against the previous transcripts as non-  
17 recurring themes were tested against following transcripts. Connections  
18 across cases were noted to identify a set of super-ordinate themes for the  
19 group.  
20  
21  
22  
23  
24  
25  
26

27 A coding framework for emergent themes was then developed and applied  
28 across the data corpus. Initial coding was undertaken independently by RL and  
29 JW and then validated by SN and PB.  
30  
31  
32

## 33 **Results**

### 34 **Participant characteristics**

35  
36  
37 Of eleven eligible participants invited, nine (5 male and 4 female) agreed to  
38 participate in the study. Previous IPA-based studies within the field of health  
39 psychology have recommended a minimum of three to six participants to achieve  
40 saturation of themes (32). Patient characteristics are summarised in table 1.  
41 Patients were aged between 26 and 72 years old (median=44, mean=45). All  
42 patients had been hospitalized following a symptomatic PE between 9 and 60  
43 months previously (median=26 months, mean=24 months). The majority of  
44 patients presented with progressive dyspnea. Two described sudden onset  
45 symptoms and two patients had cardiovascular compromise from the PE. Two  
46 major themes were identified with associated subthemes (Figure 1). Major  
47 themes with associated subthemes identified are summarized in figure one and  
48  
49  
50  
51  
52  
53  
54  
55  
56  
57  
58  
59  
60

1  
2  
3 were: PE as a life changing event, development of post traumatic stress disorder  
4 and identification of support needs.  
5  
6  
7

### 8 **Major theme 1: Life changing event**

9  
10 Patients viewed their experience of a PE as a life-changing event, which had  
11 significant impact on their emotions, behaviors and how they viewed themselves  
12 and the future. Having gone from being healthy individuals with no major co-  
13 morbidities patients reported on-going and significant emotional distress  
14 following their diagnosis. The major components of this distress came from the  
15 initial shock of the diagnosis and ongoing uncertainty of the future.  
16  
17  
18  
19  
20

#### 21 **Shock/ distress at uncertainty**

22  
23 Patients described uncertainty as a prominent source of emotional distress and  
24 discontent, as well as having impacted on how they behave in their day-to-day  
25 lives. Uncertainty was most commonly associated with feelings of worry and  
26 anxiety in relation to 'not knowing' and concerns about treatment, their future  
27 health and life-expectancy and the physical effects of their condition on their  
28 day-to-day life. For example, patients often referred to feelings of worry and  
29 anxiety in relation to not knowing whether or when they would experience  
30 another major PE.  
31  
32  
33  
34  
35  
36  
37

38 *"So I think having to live with that, the uncertainty, has caused me to worry a*  
39 *lot because no one can say for definite that A, it will never happen and B if it*  
40 *did it would never get to the level where next time I wouldn't be so lucky. I*  
41 *think that's the hardest part, just not knowing if or when it's ever going to*  
42 *happen again". 2F*  
43  
44  
45  
46  
47

48 *"But, it was just a bit, a bit of a shock because obviously, I am young, and it*  
49 *doesn't really happen to people, my age, without you know, actual problems*  
50 *with the blood..." 8F*  
51  
52  
53  
54

55 *"...it got me down first of all, it, bit of a shock, 'cause I wouldn't expect it to*  
56 *be a clot, I thought it was just a nasty bruise..." 9M*  
57  
58  
59  
60

1  
2  
3  
4  
5  
6 Patients also expressed emotional distress in relation to not knowing the cause  
7 of their major PE or why they have experienced a decrease in physical fitness.  
8  
9

10  
11 *"I just couldn't understand why it had happened to me. Why me? It was*  
12 *awful not knowing what had caused it."* 2F  
13  
14

15  
16 In a number of cases, patients described feelings of worry and anxiety and  
17 consequent restriction or withdrawal from physical activities due to having  
18 become 'hyper-vigilant' to bodily sensations due to uncertainties about not  
19 knowing or understanding the meaning or implications behind experiencing  
20 such bodily sensations. Patients referred to discerning bodily sensations such as  
21 breathlessness or increased heart rate, often experienced with attempts at  
22 physical activity as being similar to their original symptoms and thus interpreted  
23 to indicate a negative, catastrophic outcome (e.g. recurrence or death from major  
24 PE).  
25  
26  
27  
28  
29  
30  
31

32  
33 *"...frightened if I'm honest, because...um...I wasn't sure what it was, I*  
34 *thought it was pleurisy so, initially I just thought well, it's pleurisy, it's*  
35 *painful, and it's fine, but once I knew it was blood clots, and the Consultant*  
36 *said, sometimes these damage the outside of the heart, I was scared, in fact,*  
37 *when the Consultant left, um, and I was on my own, I got a bit tearful, it*  
38 *was, I thought, well, this is life threatening."* 7M  
39  
40  
41  
42  
43  
44

45  
46 *"I slightly panicked a bit later on when I sort of recovered, because I had felt*  
47 *very dizzy at that point, the nurse explained to me that my heart rate*  
48 *dropped to thirty and that's when I first probably realized you know, the*  
49 *potential outcome could be, very bad."* 6M  
50  
51  
52  
53  
54

### 55 **Loss of self**

56  
57  
58  
59  
60

1  
2  
3 Participants reported feelings of losing who they were, in particular with respect  
4 to no longer undertaking activities or behaviors that they previously identified as  
5 part of their core characteristics. The loss of self was considered more profound  
6 owing to the suddenness of the PE event from which they attributed the loss of  
7 self to originate. For some, the loss of self appeared to originate from the  
8 physical restrictions they found imposed upon them from the PE itself. For  
9 others the changes in activities resulted from being anticoagulated, thus needing  
10 to avoid activities that had a high risk of trauma and bleeding.  
11  
12  
13  
14  
15  
16

17  
18 *"I just find it difficult to comprehend that overnight I went from being fit,*  
19 *doing most things that people are able to do at my age without any*  
20 *problems at all, and in the twinkling of an eye reduced to not even being*  
21 *able to walk even ten yards across a ward to the toilet. I just don't see*  
22 *myself as fit anymore."* 4M  
23  
24  
25  
26  
27

28 *"Since I've had this he hasn't mentioned taking over the business because*  
29 *he's seen such a change in me that he knows that I'm not capable of doing it.*  
30 *And deep down, that hurts me more than anything".* 3F  
31  
32  
33  
34

35 *"It hurts me to think that they don't see me as the fun, active mum I used to*  
36 *be, and I think they do resent me for it."* 3F  
37  
38  
39

40 *"...it's had a bit of a deeper effect on me really, because, I've had to stop all*  
41 *the things I used to do, I was really into rugby, which is obviously quite a*  
42 *contact sport, um... surfing, um, and karate which is full contact as well, and*  
43 *my whole lifestyle was, sort of a, so I've had to stop everything..."* 6M  
44  
45  
46  
47

48 *"...I was told I can't really drink much and that's all I used to do on a*  
49 *Saturday after rugby and, so socially I'm not as active as I was..."* 6M  
50  
51

52 *"I hate it really..., really upsetting really 'cause I can't do anything I used to*  
53 *do, like doing."* 9M  
54  
55  
56

### **Change in focus or direction**

57  
58  
59  
60

1  
2  
3 All participants reported their experience of PE to have affected how they  
4 viewed and approached the future. Some adopted a fatalistic or nihilistic  
5 approach, suggesting they no longer felt in control of their destiny, which was at  
6 the mercy of future thrombotic events.  
7  
8  
9

10  
11 *“It doesn’t give you a very good outlook does it? I try not to think ten years*  
12 *time, twenty years time you know what I mean?” 3F*  
13

14  
15  
16 *“Ninety eight percent of the time I’m very fatalistic about it all now....I’ve*  
17 *kind of accepted my lot.” 5M*  
18  
19

20  
21 Many considered their experience as an opportunity to re-evaluate their lives  
22 and take positive steps to optimize their future. Some described a newfound  
23 appreciation of what was important to them, whilst others had made changes to  
24 their careers or their lifestyles.  
25  
26  
27  
28  
29

30  
31 *“But then I guess I’m lucky to still be alive. You know I’m still here....I’ve just*  
32 *got to accept that as much as it hurts, I want to see my girls grow up...So*  
33 *I’ve just got to be positive and grateful for what I have got. And thinking*  
34 *like that has helped me to go on with my life.” 3F*  
35  
36  
37

38  
39 *“I’ve gone into care work now which is great because I’ve got the strength to*  
40 *help people and its nice that I can relate to people who’ve had strokes and*  
41 *such because I think ‘I ain’t half lucky’, you I feel so blessed and lucky that*  
42 *I’m still here to help people you know. So for me its made me have a sort of*  
43 *different outlook on life but sort of more positive.” 3F*  
44  
45  
46  
47

48  
49 *“But, um, I do consider things to be a bit more, \*pause\* cherishing, have*  
50 *some cherished moments \*laughs\* especially straight after...now, I just feel*  
51 *like I’m back to normal...but I’m trying to make the most of, what I’ve*  
52 *got...which isn’t a lot...” 8F*  
53  
54  
55  
56  
57  
58  
59  
60



1  
2  
3  
4  
5  
6  
7  
8  
9  
10  
11  
12  
13  
14  
15  
16  
17  
18  
19  
20  
21  
22  
23  
24  
25  
26  
27  
28  
29  
30  
31  
32  
33  
34  
35  
36  
37  
38  
39  
40  
41  
42  
43  
44  
45  
46  
47  
48  
49  
50  
51  
52  
53  
54  
55  
56  
57  
58  
59  
60

*"I've um, looked at what do I need to do to improve my chances of, um, living a healthy lifestyle...so I've been now to see a nutritionist for healthy eating...I don't drink um, more than 2-3 units a day, and I'll have a couple of days off which I wouldn't have done before, and I'm trying to look at my food intake and what I'm eating, to try to lose weight... so I'm just trying to be more sensible about my eating and drinking habits and being more focused on my exercise." 7M*

### **Avoidance behaviours**

Participants frequently described a modification in their day-to-day behaviours. They avoided any activity they perceived could precipitate a further PE and those receiving anticoagulation avoided anything that might increase their risk of bleeding complications. Modification of physical activity and exertion was the commonest behavior change in order to minimise exposure to potential physical trauma.

*"I was quite outgoing and robust...feel like I've gone more timid...I don't get involved in anything...I'm afraid I'll bang my head...I just really, really refrain from doing much." 6M*

*"...I'm certainly very careful, I don't get any cuts that you know, are unnecessarily from silly little things, so you'd be careful around being um, uh...when I was out on the road bike cycling or you know, sometimes I wouldn't put my helmet on, now I always put my helmet on, so it's just made me be a bit more careful around what I'm doing incase I you know, bleed or um, or something happens from that." M7*

### **Major theme 2: Post Traumatic Stress Disorder**

Post traumatic stress disorder (PTSD) is characterized by a group of symptoms including flashbacks, avoidance behaviours, numbing of memories and hyper

1  
2  
3 arousal which continue beyond a month after the traumatic event(33, 34).  
4 Almost all participants volunteered symptoms suggestive of PTSD, some  
5 describing symptom clusters which suggested a significant degree of functional  
6 disability due to the condition.  
7  
8  
9

### 10 11 **Flashbacks** 12

13  
14 Flashbacks to, and memories of, the initial PE experience were common. Ongoing  
15 anticoagulation, be it self injecting low molecular weight heparin (LMWH),  
16 taking oral anticoagulants or having blood tests acted as profound triggers to  
17 flashbacks and reminders of their perceived “near death experience”.  
18  
19  
20  
21

22  
23 *“All these sorts of things; its brought back to you all the time even when*  
24 *your not consciously thinking about it, its brought back to you all the*  
25 *time.”5M*  
26  
27

28  
29  
30 *“And then I reverted to injecting myself and then that then carried on but it*  
31 *was just a constant reminder of what had happened, even now, although its*  
32 *become routine, it just makes me think how close I came to almost dying, to*  
33 *how ill I was.”4M*  
34  
35  
36

37  
38  
39 *“For instance it might be time to my injection and it’ll just all come back to*  
40 *me. The worries, will it happen again, will I be so lucky next time?”2F*  
41  
42  
43

44  
45 Whilst some reported the content of the flashback episode to be short-lived,  
46 others experienced a more protracted experience reliving the entire distressing  
47 episode.  
48  
49

50  
51  
52 *I’ll go through the whole thing. Like it will run from start to finish like a*  
53 *movie. Its very hard to switch off once I’ve started thinking about it, it has to*  
54 *play out if you like”2F*  
55  
56  
57  
58  
59  
60

### **Numbing of memories**

Several participants recalled a blunting of their emotion during the experience with some disassociation with reality.

*"...some sense which it doesn't seem real..." 5M*

*"...seems like, as if it kind of wasn't real..." 8F*

Others described the use of denial, be it conscious or sub conscious in dealing with the trauma of the experience.

*"...for a long time I was just, well, in denial I think, "oh no, I'll be alright, I'll be alright..."6M*

*"But when they (thoughts/feelings associated with major PE) come to the surface, well I have puzzles and things which I do to block it out...I don't want to think about it so my puzzles are one way of avoiding thinking about it for me." 1F*

### **Hyper vigilance**

Patients reported increased increased vigilance and awareness of anxiety any symptoms they felt could be associated with a recurrent PE. Such awareness was associated with increased anxiety and catastrophising thought processes.

*"In the beginning I was very very very weary, very scared. I would only have to get a sort of sign or niggle in my chest and I would start to panic thinking that it was going to happen again or I'd end up in a heap on the floor"2F*

*"It was always on my mind. It made me more conscious of making sure that if I was on my own somewhere people knew....I taught my daughter nannies house number...just in case something did happen. It just makes me angry to think that no-one can tell me I won't have another one and now I have to live my life by this"2F*

### **Major theme 3: Support needs**

All participants described needing a significant degree of support and it was evident that the support needed was ongoing but differed over time. The nature of support required often required clinical and or specialist knowledge, and appeared to be an unmet need which could only be met by appropriate healthcare professionals.

#### **Information**

During the initial stages of diagnosis and treatment, participants required considerable information regarding their condition, their prognosis and long term treatment. Many described their care as focusing on the biomedical with little attention given to support through information giving or psychological care.

*“None of them actually said anything to make me understand, it was just a case of ‘you’ve had these clots, they’ve gone to your lungs’, none of the rest of what else could have happened before they got to the lungs registered or how serious it was when it got to there.”5F*

Where information was not freely available, participants would seek answers on the Internet. This could result in accessing upsetting information, which without access to additional support or proved more distressing than helpful.

*“Yeah after looking on the internet I did the whole sitting, crying, rocking thing thinking ‘oh me god’ and then told myself off for looking to be honest because finding out that way with no-one there to kind of go through it with me knocked me for six.” M5*

Participants were clear on the degree of information they required: frequently describing the need to understand why this had happened to them and what they should/ should not do from then on to rehabilitate effectively.

1  
2  
3  
4  
5  
6  
7  
8  
9  
10  
11  
12  
13  
14  
15  
16  
17  
18  
19  
20  
21  
22  
23  
24  
25  
26  
27  
28  
29  
30  
31  
32  
33  
34  
35  
36  
37  
38  
39  
40  
41  
42  
43  
44  
45  
46  
47  
48  
49  
50  
51  
52  
53  
54  
55  
56  
57  
58  
59  
60

*"It causes me quite a lot of concern doing things...and I'm scared of doing them in case it happens again....I just get so annoyed that's that the thing that will stop me, because I worry that if I get a bit out of breath or feel my heart going that I'll end up in a heap on the floor basically...but I wouldn't worry as much if I just knew what was causing it, or someone could tell me how much I can push myself"*

*"It just annoys me because I just can't achieve what I used to achieve and I just haven't got the answers as to why. Why can't I? What's stopping me? What's making that happen to me? If I had the answers I'd be alright with it. I'd get on with it". 3F*

When basic information was provided, including realistic outcomes, participants were able to make more sense of their lives and symptoms, describing a more positive rehabilitation.

*"So I asked if he could provide me with some information about what was the likely cause and some information about what I could expect or hope for really in recovering for me which was quite a fortuitous bit of information that I got which encouraged me a bit but it sort of did seem possible that by just keeping on with the blood thinning that these could eventually get re-absorbed and I could get back to sort of normal activity." 4M*

### **Empathy**

Participants considered themselves to have experienced a narrow escape from death and as described before expressed considerable psychological distress after the event. They did not feel that healthcare professionals fully appreciated the seriousness of their experience and thus did not understand the distress associated with symptoms suggestive of VTE recurrence.

*"But I cant remember thinking that you know, I might have died, that my daughter might not have had her mum, and no one helping to make sure*

1  
2  
3 *that I understood what was going on, or what was wrong with me, or how*  
4 *this would effect my life. I just remember feeling quite resentful of the*  
5 *medical staff.” 2F*

6  
7  
8 *“And I did start to panic then and think well you know if I had a pain in the*  
9 *chest again I could be telling someone what I think it is but would they*  
10 *actually take my word for it kind of thing. And I did actually feel that it*  
11 *wasn’t really taken too seriously. I mean the fact that it could of killed me*  
12 *and they had a very blasé approach toward it.” 2F*

### 13 14 15 16 17 18 **Access to support**

19  
20  
21 Whilst there was a significant requirement for information and support from  
22 healthcare professionals, some participants also identified the potential benefits  
23 of self-help/ support groups. The opportunity to meet other people who  
24 understood their experiences and associated feelings was considered a positive  
25 thing and there was a belief that several unmet needs could be provided by  
26 fellow PE patients.  
27  
28  
29  
30  
31

32  
33 *“I would have loved, and still would like some sort of group thing or support*  
34 *to be available to help me come to terms with what’s happened to*  
35 *me...somewhere where somebody could have explained ‘yeah its normal to*  
36 *feel like that’ etcetera, you know like maybe other people who had been*  
37 *through the same thing. I don’t think I would of felt so on my own then....*  
38 *Just to have this level of conversation with somebody back then would have*  
39 *helped massively. To help me process it all through, because it was very ‘off*  
40 *you go’ and that was that”. 5M*  
41  
42  
43  
44  
45  
46  
47

### 48 49 **Discussion**

50  
51 Venous thromboembolism is a common medical condition, which may cause a  
52 spectrum of physical symptoms. In its most severe form, major symptomatic  
53 pulmonary emboli may lead to cardiovascular compromise and even death.  
54  
55 Whilst the long-term complications such as post thrombotic syndrome and  
56  
57  
58  
59  
60

1  
2  
3 pulmonary hypertension are well recognized, little has been known about the  
4 psychological impact of symptomatic VTE. In our study of previously healthy  
5 adults who experienced a symptomatic pulmonary embolus we have identified  
6 that the psychological consequences of experiencing symptomatic VTE are  
7 considerable. The development of VTE is considered a life-changing event with  
8 some patients feeling a loss of identity and role in life. More concerning appears  
9 to be a profound and ongoing collection of symptoms suggestive of the  
10 development of PTSD. This is the first time that PTSD has been identified as a  
11 consequence of VTE. To some extent these findings shouldn't come as a surprise  
12 since features that contribute to the development of PTSD are common in VTE  
13 patients; patients of previous good health experience a traumatic life threatening  
14 event and the face a future of uncertainty regarding recurrence. However, these  
15 findings raise the possibility that as healthcare professionals we are failing to  
16 recognise the psychological needs of our patients.  
17  
18  
19  
20  
21  
22  
23  
24  
25  
26  
27

28 There are several limitations to this study: the number of participants is small  
29 and although the numbers are appropriate for such qualitative methodology, a  
30 larger study is clearly needed to identify the true prevalence of PTSD using a  
31 validated screening tool. In particular it is not possible to identify whether PTSD  
32 may be more prevalent in certain sub groups of patients with PE. Within the  
33 group sampled the majority were younger than 45 years old and it is possible  
34 that the greater degree of psychological distress is seen in younger patients with  
35 less illness experience. Likewise PTSD may be more prevalent in those without  
36 obvious precipitating cause of VTE since they will live with ongoing uncertainty  
37 regarding recurrence. The long-term treatment plan may also play a role and it  
38 would be interesting to see whether PTSD is more likely to develop in those with  
39 ongoing reminders of their illness such as long term anticoagulation.  
40  
41  
42  
43  
44  
45  
46  
47  
48

49 There is a possibility of selection bias since all participants interviewed had  
50 required admission to hospital for their symptomatic PE and as such were likely  
51 to be those with more severe symptoms and thus a more traumatic experience.  
52 Whilst the likelihood of bias is acknowledged, it shouldn't invalidate the findings  
53 in the context of those with the most significant VTE episodes. It would be  
54 presumptive to assume that all VTE patients experienced PTSD in the same way  
55  
56  
57  
58  
59  
60

1  
2  
3 that one acknowledges that PTSD occurs in some but not all myocardial  
4 infarction patients. It does, however, highlight that of those developing VTE, a  
5 subgroup may experience significant psychological sequelae and it would make  
6 clinical sense to identify those at greatest risk and arrange appropriate support.  
7  
8 At present it is not possible to identify whether the development of PTSD is  
9 directly related to the VTE experience or whether there are particular pre  
10 morbid characteristics that predispose people. It is of interest to note that  
11 participants felt they received limited information and would have liked more  
12 opportunities to understand their condition from an appropriately trained  
13 professional rather than seek information themselves on the internet.  
14  
15

16  
17 Finally this study highlights several areas of opportunity for healthcare  
18 professionals to deliver support to patients post VTE be it through information  
19 giving, empathy or identifying psychological distress early on. It is possible early  
20 intervention may reduce the development of long-term psychological distress  
21 and the ongoing challenges it brings.  
22  
23

24  
25 SN affirms that the manuscript is an honest, accurate, and transparent account of  
26 the study being reported; that no important aspects of the study have been  
27 omitted; and that any discrepancies from the study as planned (and, if relevant,  
28 registered) have been explained.  
29  
30  
31  
32  
33  
34  
35  
36  
37  
38  
39  
40  
41  
42  
43  
44  
45  
46  
47  
48  
49  
50  
51  
52  
53  
54  
55  
56  
57  
58  
59  
60



Contributorship Statement: SN, PB and SL conceived the study. RL and JW undertook interviews. JW,RL, PB and SN undertook analysis of data. All authors contributed to the final manuscript.

Competing Interests: None

Data Sharing Statement: No additional data available.

For peer review only

## References

1. Silverstein MD, Heit JA, Mohr DN, et al. Trends in the incidence of deep vein thrombosis and pulmonary embolism: a 25-year population-based study. *Arch Intern Med.* [Research Support, Non-U.S. Gov't Research Support, U.S. Gov't, P.H.S.]. 1998 Mar 23;158(6):585-93.
2. Prandoni P, Lensing AW, Cogo A, et al. The long-term clinical course of acute deep venous thrombosis. *Ann Intern Med.* 1996 Jul 1;125(1):1-7.
3. Yamaki T, Hamahata A, Soejima K, et al. Factors predicting development of post-thrombotic syndrome in patients with a first episode of deep vein thrombosis: preliminary report. *Eur J Vasc Endovasc Surg.* 2011 Jan;41(1):126-33.
4. Mohr DN, Silverstein MD, Heit JA, et al. The venous stasis syndrome after deep venous thrombosis or pulmonary embolism: a population-based study. *Mayo Clin Proc.* [Research Support, Non-U.S. Gov't Research Support, U.S. Gov't, P.H.S.]. 2000 Dec;75(12):1249-56.
5. Kahn SR, Shrier I, Julian JA, et al. Determinants and time course of the postthrombotic syndrome after acute deep venous thrombosis. *Ann Intern Med.* [Multicenter Study Research Support, Non-U.S. Gov't]. 2008 Nov 18;149(10):698-707.
6. Pengo V, Lensing AW, Prins MH, et al. Incidence of chronic thromboembolic pulmonary hypertension after pulmonary embolism. *N Engl J Med.* 2004 May 27;350(22):2257-64.
7. Becattini C, Agnelli G, Pesavento R, et al. Incidence of chronic thromboembolic pulmonary hypertension after a first episode of pulmonary embolism. *Chest.* [Multicenter Study]. 2006 Jul;130(1):172-5.
8. Poli D, Grifoni E, Antonucci E, Arcangeli C, et al. Incidence of recurrent venous thromboembolism and of chronic thromboembolic pulmonary hypertension in patients after a first episode of pulmonary embolism. *J Thromb Thrombolysis.* 2010 Oct;30(3):294-9.
9. Vedantham S. Valvular dysfunction and venous obstruction in the post-thrombotic syndrome. *Thromb Res.* [Review]. 2009;123 Suppl 4:S62-5.
10. Stein E, Ramakrishna H, Augoustides JG. Recent advances in chronic thromboembolic pulmonary hypertension. *J Cardiothorac Vasc Anesth.* [Review]. 2011 Aug;25(4):744-8.
11. Kim NH. Assessment of operability in chronic thromboembolic pulmonary hypertension. *Proc Am Thorac Soc.* [Research Support, Non-U.S. Gov't Review]. 2006 Sep;3(7):584-8.
12. Riedel M, Stanek V, Widimsky J, et al. Longterm follow-up of patients with pulmonary thromboembolism. Late prognosis and evolution of hemodynamic and respiratory data. *Chest.* 1982 Feb;81(2):151-8.
13. Kahn SR, Hirsch A, Shrier I. Effect of postthrombotic syndrome on health-related quality of life after deep venous thrombosis. *Arch Intern Med.* [Research Support, Non-U.S. Gov't]. 2002 May 27;162(10):1144-8.
14. Kahn SR, Shbaklo H, Lamping DL, et al. Determinants of health-related quality of life during the 2 years following deep vein thrombosis. *J Thromb Haemost.* [Research Support, Non-U.S. Gov't]. 2008 Jul;6(7):1105-12.

15. van Korlaar I, Vossen C, Rosendaal F, et al. Quality of life in venous disease. *Thromb Haemost.* [Research Support, Non-U.S. Gov't Research Support, U.S. Gov't, P.H.S. Review]. 2003 Jul;90(1):27-35.
16. van Korlaar IM, Vossen CY, Rosendaal FR, et al. The impact of venous thrombosis on quality of life. *Thromb Res.* [Clinical Trial Research Support, U.S. Gov't, P.H.S.]. 2004;114(1):11-8.
17. Lukas PS, Krummenacher R, Biasiutti FD, et al. Association of fatigue and psychological distress with quality of life in patients with a previous venous thromboembolic event. *Thromb Haemost.* 2009 Dec;102(6):1219-26.
18. Lerman C, Croyle R. Psychological issues in genetic testing for breast cancer susceptibility. *Arch Intern Med.* [Research Support, Non-U.S. Gov't Research Support, U.S. Gov't, P.H.S. Review]. 1994 Mar 28;154(6):609-16.
19. Noble S. Low-molecular-weight heparin and survival in lung cancer. *Thromb Res.* 2012 Apr;129 Suppl 1:S114-8.
20. Haralabopoulos GC, Grant DS, Kleinman HK, et al. Thrombin promotes endothelial cell alignment in Matrigel in vitro and angiogenesis in vivo. *Am J Physiol.* [Research Support, Non-U.S. Gov't]. 1997 Jul;273(1 Pt 1):C239-45.
21. Zabora J, BrintzenhofeSzoc K, Curbow B, et al. The prevalence of psychological distress by cancer site. *Psychooncology.* 2001 Jan-Feb;10(1):19-28.
22. White RH. The epidemiology of venous thromboembolism. *Circulation.* [Review]. 2003 Jun 17;107(23 Suppl 1):I4-8.
23. Shalev AY. Post-traumatic stress disorder: a biopsychological perspective. *Isr J Psychiatry Relat Sci.* [Review]. 1993;30(2):102-9.
24. Bennett P, Brooke S. Intrusive memories, post-traumatic stress disorder and myocardial infarction. *Br J Clin Psychol.* 1999 Nov;38 ( Pt 4):411-6.
25. Tedstone JE, Tarrier N. Posttraumatic stress disorder following medical illness and treatment. *Clin Psychol Rev.* [Review]. 2003 May;23(3):409-48.
26. Alloy LB, Abramson LY. Learned helplessness, depression, and the illusion of control. *J Pers Soc Psychol.* [Research Support, U.S. Gov't, P.H.S.]. 1982 Jun;42(6):1114-26.
27. Ireys HT, Werthamer-Larsson LA, Kolodner KB, et al. Mental health of young adults with chronic illness: the mediating effect of perceived impact. *J Pediatr Psychol.* [Clinical Trial Randomized Controlled Trial Research Support, U.S. Gov't, P.H.S.]. 1994 Apr;19(2):205-22.
28. Moores LK. Medical uncertainty: informing decision making for patients with acute pulmonary embolism. *Chest.* [Comment Editorial]. 2009 Oct;136(4):952-3.
29. Noble SI, Finlay IG. Is long-term low-molecular-weight heparin acceptable to palliative care patients in the treatment of cancer related venous thromboembolism? A qualitative study. *Palliat Med.* 2005 Apr;19(3):197-201.
30. Noble SI, Nelson A, Finlay IG. Factors influencing hospice thromboprophylaxis policy: a qualitative study. *Palliat Med.* 2008 Oct;22(7):808-13.
31. Noble SI, Nelson A, Turner C, et al. Acceptability of low molecular weight heparin thromboprophylaxis for inpatients receiving palliative care: qualitative study. *Bmj.* 2006 Mar 11;332(7541):577-80.

- 1  
2  
3 32. Smith JA, Larkin MH, Flowers P. Interpretative phenomenological analysis  
4 : theory, method and research. Los Angeles ; London: SAGE; 2009.  
5 33. The ICD-10 classification of mental and behavioural disorders : diagnostic  
6 criteria for research: WHO; 1993.  
7 34. Diagnostic and statistical manual of mental disorders : DSM-5. Fifth  
8 edition. ed.  
9

10  
11  
12  
13  
14  
15  
16  
17  
18  
19  
20  
21  
22  
23  
24  
25  
26  
27  
28  
29  
30  
31  
32  
33

| Participant/sex | Age in years | Time since PE in months | Addition clinical information                                          |
|-----------------|--------------|-------------------------|------------------------------------------------------------------------|
| 1F              | 72           | 12                      | Sudden collapse with cardiovascular compromise                         |
| 2F              | 32           | 60                      | Sudden dyspnoea during pregnancy                                       |
| 3F              | 44           | 60                      | Progressive dyspnoea                                                   |
| 4M              | 68           | 24                      | Progressive dyspnoea                                                   |
| 5M              | 29           | 24                      | Progressive dyspnoea                                                   |
| 6M              | 50           | 18                      | Progressive dyspnoea. On life long warfarin.                           |
| 7M              | 55           | 12                      | Progressive dyspnoea. Initially resistant to warfarin. Receiving LMWH. |
| 8F              | 26           | 9                       | Progressive dyspnoea                                                   |
| 9M              | 28           | 12                      | Progressive dyspnoea with cardiovascular compromise.                   |

34 **Table 1 Characteristics of participants (LMWH = low molecular weight**  
35 **heparin)**  
36  
37  
38  
39  
40  
41  
42  
43  
44  
45  
46  
47  
48  
49  
50  
51  
52  
53  
54  
55  
56  
57  
58  
59  
60

1  
2  
3  
4 **The long-term psychological consequences of symptomatic pulmonary**  
5 **embolism: a qualitative study.**  
6  
7

8  
9 [Simon Noble, Marie Curie Palliative Care Research Group, Cardiff University,](#)  
10 [Cardiff, Wales, UK](#)

11  
12 [Rhian Lewis, Department of Clinical Psychology, Swansea University, Swansea,](#)  
13 [Wales, UK](#)

14  
15 [Jodie Whithers, Department of Clinical Psychology, Swansea University, Swansea,](#)  
16 [Wales, UK](#)

17  
18 [Sarah Lewis, Department of Haematology, Nevill Hall Hospital, Abergavenny,](#)  
19 [Wales, UK](#)

20  
21 [Paul Bennett, Department of Clinical Psychology, Swansea University, Swansea,](#)  
22 [Wales, UK](#)

23  
24 [Keywords: Thromboembolism, Anticoagulation, Anxiety disorders, Qualitative](#)  
25 [research, Vascular medicine](#)

26  
27 [Word count 4625](#)  
28  
29  
30  
31  
32  
33  
34  
35  
36  
37

38 Corresponding author:

39 Simon Noble,

40 Marie Curie Palliative Medicine Research Group

41 6<sup>th</sup> Floor

42 Neuadd Meirionyd

43 Cardiff University

44 Heath Park Campus

45 CF14 4YS

46 Wales, UK

47 Telephone: 02920687500

48 Fax: 02920687501  
49  
50  
51  
52  
53  
54  
55  
56  
57  
58  
59  
60

## Objective

To explore the psychological consequences of experiencing symptomatic pulmonary embolism.

## Design

Qualitative interview based study using interpretative phenomenological analysis.

## Setting

Outpatients who attended an anticoagulation clinic in a district general hospital.

## Participants

Patients attending an anticoagulation clinic following hospital admission for symptomatic pulmonary embolism were approached to participate. A total of nine (4 female, 5 male) out of 11 patients approached, agreed to be interviewed. Participants were aged between 26 and 72 years and had experienced a PE between 9 and 60 months previously (median=26 months, mean=24 months).

## Intervention

Audiotaped semi structured qualitative interviews were undertaken to explore participants experiences of having a PE and how it had affected their lives since. Data was transcribed and analysed using interpretative phenomenological analysis to identify emergent themes.

## Results

Three major themes with associated sub themes were identified. Participants described having a PE as a life changing experience comprising of initial shock, followed by feeling of loss of self, life changing decisions and behavior modification. Features of post-traumatic stress disorder (PTSD) were described with flashbacks, hypervigilance and intrusive thoughts being most prevalent. Participants identified several areas of support needed for such patients including easier access to support through information giving and emotional support.

## Conclusion

The long-term consequences of VTE go beyond the physical alone. Patients describe experiencing symptomatic PE to be a life changing distressing event leading to behaviour modification and in some PTSD. It is likely that earlier psychological intervention may reduce such long-term sequelae.

1  
2  
3  
4  
5  
6  
7  
8  
9  
10  
11  
12  
13  
14  
15  
16  
17  
18  
19  
20  
21  
22  
23  
24  
25  
26  
27  
28  
29  
30  
31  
32  
33  
34  
35  
36  
37  
38  
39  
40  
41  
42  
43  
44  
45  
46  
47  
48  
49  
50  
51  
52  
53  
54  
55  
56  
57  
58  
59  
60

#### Strengths of this study

- This is the first time the psychological consequences of symptomatic pulmonary embolism ~~common medical condition~~ have been explored.
- This paper highlights an unmet clinical need
- This paper is of relevance to a breadth of health professionals
- This paper gives patients a voice

#### Weaknesses of the study

- The patients were recruited from a single site
  - Whilst appropriate in number for interpretative phenomenological analysis, the number of participants are small
  - The data cannot be generalised among all PE patients but highlights the need to explore the area further.
- peer review only

1  
2  
3  
4  
5  
6  
7  
8  
9  
10  
11  
12  
13  
14  
15  
16  
17  
18  
19  
20  
21  
22  
23  
24  
25  
26  
27  
28  
29  
30  
31  
32  
33  
34  
35  
36  
37  
38  
39  
40  
41  
42  
43  
44  
45  
46  
47  
48  
49  
50  
51  
52  
53  
54  
55  
56  
57  
58  
59  
60

Venous thromboembolism (VTE), clinically presenting as deep venous thrombosis (DVT) or pulmonary embolism (PE), remains a major cause of morbidity and mortality worldwide, affecting 1 in 1000 patients annually(1). The long-term physical consequences of venous thromboembolism are well documented; post-thrombotic syndrome (PTS) complicates between 25 - 50% DVT cases (2-5) and 0.4 - 4% of patients who experience PE will develop chronic thromboembolic pulmonary hypertension (CTPH)(6-8). Both these complications represent a considerable healthcare burden. Patients with PTS may not only require long-term compression stockings but also endovascular surgery if symptoms prove refractory (9). For patients who develop CTPH, medical therapy is yet to demonstrate any survival advantage leaving pulmonary thromboendarterectomy as the treatment of choice (10, 11). However only half of the patients will qualify for surgery and, of the remainder, 50% are likely to die within a year if their mean pulmonary arterial pressure exceeds 50 mmHg(11, 12).

The long-term sequelae following acute VTE go beyond the physical alone. The development of PTS appears to have a negative impact on quality of life (QoL) in patients experiencing VTE (13, 14). Using the Venous Insufficiency Epidemiologic and Economic Study quality-of-life questionnaire (VEINES-QOL) and its validated subscale of 10 items on venous symptoms (VEINES-Sym), patients with PTS were shown to have significantly worse disease-specific quality-of-life scores than those without PTS (P =0.003), which worsened significantly with increasing severity of PTS (13, 14). Furthermore, the development of PTS is considered major determinant of a patients' health related QoL two years after VTE (14).

Whilst the physical consequences of VTE have been extensively reported, the possible impact of VTE on patients' psychological and emotional well-being has received ~~less~~ attention. Such work has involved the use of validated QoL tools and has focused on the chronic consequences of deep vein thrombosis and less so on pulmonary emboli(15-17). Other common and potentially life-threatening conditions such as cancer and myocardial infarction have been researched extensively with clear evidence that such illnesses can result in



1  
2  
3 | significant psychological morbidity. To date, no qualitative studies have  
4 investigated the impact of VTE on everyday life.

5  
6 The experience of any health related crisis is likely to result in some form of  
7 emotional distress presenting in a variety of forms including worry, anxiety,  
8 intrusive ideation and dysphoric mood, amongst other negative emotional  
9 reactions(18, 19). This appears most pronounced in medical events that pose a  
10 significant threat to life and can manifest as anxiety, anger, depression and even  
11 symptoms of post-traumatic stress disorder (PTSD) (1, 20-22). Historically PTSD  
12 has been associated with experiences of war, rape or attempted murder, where  
13 the individual is exposed to an external threat to the physical integrity of  
14 themselves or others. However research now suggests PTSD may also arise from  
15 internal physical experiences, particularly those associated with a direct or  
16 imminent threat to life(23, 24).

17  
18 Life-threatening and traumatic medical events are those most likely to cause  
19 psychological distress and behavioural changes associated with symptoms of  
20 PTSD (25). Risk for PTSD is heightened by the perception of uncertainty and/or  
21 unpredictability associated with the traumatic medical experience and worsened  
22 where the patient believes adverse outcomes to be inevitable or largely  
23 uncontrollable (26, 27). Since VTE is a potentially life threatening condition  
24 which often occurs in previously well patients, coupled with the uncertainty of  
25 recurrence it is possible that such patients are at increased risk of emotional  
26 distress, especially those who have experienced major PE(28). We therefore  
27 conducted a study to explore the psychological impact of VTE in patients who  
28 had experienced a major symptomatic PE.  
29  
30  
31  
32  
33  
34  
35  
36  
37  
38  
39  
40  
41  
42  
43  
44

## 45 **Methods**

46 This study was undertaken using qualitative methodologies, which have  
47 previously been used to evaluate patient experience and clinician attitudes  
48 regarding VTE management (29-31).  
49  
50  
51  
52

53 Ethical approval was obtained through the NHS South Wales Research Ethics  
54 Committee. Patients attending a dedicated haematology/ thrombosis clinic,  
55 within a district general hospital, were sequentially screened for inclusion into  
56  
57  
58  
59  
60

1  
2  
3 the study and invited by letter to participate. All eligible patients were invited to  
4 participate.  
5  
6

7  
8 Inclusion criteria:

- 9  
10
- 11 • Aged between 18 and 70 years of age
  - 12 • Patients who had experienced a symptomatic PE which resulted in  
13 admission to hospital
  - 14 • Able to consent and participate in a 30-minute interview.  
15
- 16

17 Exclusion criteria:

- 18 • Presence of cancer
  - 19 • Known history of previous mental illness or psychological distress prior  
20 to PE  
21
- 22

23  
24 Semi-structured interviews were carried out over a twelve-month period by two  
25 female researchers (RL and JW) as part of an MSc research project under the  
26 supervision of PB and SN. Both researchers were experienced in the field of  
27 clinical psychology and trained in conducting qualitative research. Following  
28 initial pilot testing, the interviews were conducted within patients' homes and  
29 guided by a prompt list to ensure that the same issues were discussed at each  
30 interview. Researchers had no prior relationship with participants or declared  
31 clinical interest in VTE management. Data were elicited on the following:  
32  
33

- 34 • Their experience of suffering a major PE, and
  - 35 • How they felt this had affected or influenced their day-to-day lives in  
36 terms of  
37
    - 38 – Routines and activities
    - 39 – Feelings, attitudes and beliefs about themselves
- 40  
41  
42  
43  
44  
45  
46  
47

48 To facilitate this, questions were open-ended with the use of prompts to probe  
49 further into issues, which arose as significant or meaningful to the participant.  
50 Interviews were digitally recorded and transcribed verbatim. Field notes were  
51 also taken. Interviews took approximately thirty minutes each.  
52  
53  
54

## 55 Analysis

56  
57  
58  
59  
60

1  
2  
3 The analytic framework for this qualitative study was based on Interpretative  
4 Phenomenological Analysis (IPA)(32). IPA aims to explore how participants  
5 make sense of their experience but is also interpretative, recognising the  
6 researcher's conceptions, and experience, as brought to the analysis.  
7  
8

9  
10 The data was analysed in the following stages:

- 11 • The first transcript was read line-by-line and annotated with initial  
12 comments.
- 13 • Initial comments were grouped into themes.
- 14 • Connections between themes were developed until an organised master  
15 list and thematic rationale was achieved.
- 16 • New themes were tested against the previous transcripts as non-  
17 recurring themes were tested against following transcripts. Connections  
18 across cases were noted to identify a set of super-ordinate themes for the  
19 group.
- 20 • New themes were tested against the previous transcripts as non-  
21 recurring themes were tested against following transcripts. Connections  
22 across cases were noted to identify a set of super-ordinate themes for the  
23 group.
- 24 • New themes were tested against the previous transcripts as non-  
25 recurring themes were tested against following transcripts. Connections  
26 across cases were noted to identify a set of super-ordinate themes for the  
27 group.

28 A coding framework for emergent themes was then developed and applied  
29 across the data corpus. Initial coding was undertaken independently by RL and  
30 JW and then validated by SN and PB.  
31

## 32 33 **Results**

### 34 **Participant characteristics**

35  
36  
37 Of eleven eligible participants invited, nine (5 male and 4 female) agreed to  
38 participate in the study. Previous IPA-based studies within the field of health  
39 psychology have recommended a minimum of three to six participants to achieve  
40 saturation of themes (32). Patient characteristics are summarised in table 1.  
41 Patients were aged between 26 and 72 years old (median=44, mean=45). All  
42 patients had been hospitalized following a symptomatic PE between 9 and 60  
43 months previously (median=26 months, mean=24 months). The majority of  
44 patients presented with progressive dyspnea. Two described sudden onset  
45 symptoms and two patients had cardiovascular compromise from the PE. Two  
46 major themes were identified with associated subthemes (Figure 1). Major  
47 themes with associated subthemes identified are summarized in figure one and  
48  
49  
50  
51  
52  
53  
54  
55  
56  
57  
58  
59  
60

1  
2  
3 were: PE as a life changing event, development of post traumatic stress disorder  
4 and identification of support needs.  
5  
6  
7

### 8 **Major theme 1: Life changing event**

9  
10 Patients viewed their experience of a PE as a life-changing event, which had  
11 significant impact on their emotions, behaviors and how they viewed themselves  
12 and the future. Having gone from being healthy individuals with no major co-  
13 morbidities patients reported on-going and significant emotional distress  
14 following their diagnosis. The major components of this distress came from the  
15 initial shock of the diagnosis and ongoing uncertainty of the future.  
16  
17  
18  
19  
20

### 21 **Shock/ distress at uncertainty**

22  
23 Patients described uncertainty as a prominent source of emotional distress and  
24 discontent, as well as having impacted on how they behave in their day-to-day  
25 lives. Uncertainty was most commonly associated with feelings of worry and  
26 anxiety in relation to 'not knowing' and concerns about treatment, their future  
27 health and life-expectancy and the physical effects of their condition on their  
28 day-to-day life. For example, patients often referred to feelings of worry and  
29 anxiety in relation to not knowing whether or when they would experience  
30 another major PE.  
31  
32  
33  
34  
35  
36  
37

38 *"So I think having to live with that, the uncertainty, has caused me to worry a*  
39 *lot because no one can say for definite that A, it will never happen and B if it*  
40 *did it would never get to the level where next time I wouldn't be so lucky. I*  
41 *think that's the hardest part, just not knowing if or when it's ever going to*  
42 *happen again". 2F*  
43  
44  
45  
46  
47

48 *"But, it was just a bit, a bit of a shock because obviously, I am young, and it*  
49 *doesn't really happen to people, my age, without you know, actual problems*  
50 *with the blood..." 8F*  
51  
52  
53  
54

55 *"...it got me down first of all, it, bit of a shock, 'cause I wouldn't expect it to*  
56 *be a clot, I thought it was just a nasty bruise..." 9M*  
57  
58  
59  
60

1  
2  
3  
4  
5  
6  
7  
8  
9  
10  
11  
12  
13  
14  
15  
16  
17  
18  
19  
20  
21  
22  
23  
24  
25  
26  
27  
28  
29  
30  
31  
32  
33  
34  
35  
36  
37  
38  
39  
40  
41  
42  
43  
44  
45  
46  
47  
48  
49  
50  
51  
52  
53  
54  
55  
56  
57  
58  
59  
60

Patients also expressed emotional distress in relation to not knowing the cause of their major PE or why they have experienced a decrease in physical fitness.

*"I just couldn't understand why it had happened to me. Why me? It was awful not knowing what had caused it." 2F*

In a number of cases, patients described feelings of worry and anxiety and consequent restriction or withdrawal from physical activities due to having become 'hyper-vigilant' to bodily sensations due to uncertainties about not knowing or understanding the meaning or implications behind experiencing such bodily sensations. Patients referred to discerning bodily sensations such as breathlessness or increased heart rate, often experienced with attempts at physical activity as being similar to their original symptoms and thus interpreted to indicate a negative, catastrophic outcome (e.g. recurrence or death from major PE).

*"...frightened if I'm honest, because...um...I wasn't sure what it was, I thought it was pleurisy so, initially I just thought well, it's pleurisy, it's painful, and it's fine, but once I knew it was blood clots, and the Consultant said, sometimes these damage the outside of the heart, I was scared, in fact, when the Consultant left, um, and I was on my own, I got a bit tearful, it was, I thought, well, this is life threatening." 7M*

*"I slightly panicked a bit later on when I sort of recovered, because I had felt very dizzy at that point, the nurse explained to me that my heart rate dropped to thirty and that's when I first probably realized you know, the potential outcome could be, very bad." 6M*

### **Loss of self**

1  
2  
3 Participants reported feelings of losing who they were, in particular with respect  
4 to no longer undertaking activities or behaviors that they previously identified as  
5 part of their core characteristics. The loss of self was considered more profound  
6 owing to the suddenness of the PE event from which they attributed the loss of  
7 self to originate. For some, the loss of self appeared to originate from the  
8 physical restrictions they found imposed upon them from the PE itself. For  
9 others the changes in activities resulted from being anticoagulated, thus needing  
10 to avoid activities that had a high risk of trauma and bleeding.  
11  
12  
13  
14  
15  
16

17  
18 *"I just find it difficult to comprehend that overnight I went from being fit,*  
19 *doing most things that people are able to do at my age without any*  
20 *problems at all, and in the twinkling of an eye reduced to not even being*  
21 *able to walk even ten yards across a ward to the toilet. I just don't see*  
22 *myself as fit anymore."* 4M  
23  
24  
25  
26  
27

28  
29 *"Since I've had this he hasn't mentioned taking over the business because*  
30 *he's seen such a change in me that he knows that I'm not capable of doing it.*  
31 *And deep down, that hurts me more than anything".* 3F  
32  
33  
34

35  
36 *"It hurts me to think that they don't see me as the fun, active mum I used to*  
37 *be, and I think they do resent me for it."* 3F  
38  
39

40  
41 *"...it's had a bit of a deeper effect on me really, because, I've had to stop all*  
42 *the things I used to do, I was really into rugby, which is obviously quite a*  
43 *contact sport, um... surfing, um, and karate which is full contact as well, and*  
44 *my whole lifestyle was, sort of a, so I've had to stop everything..."* 6M  
45  
46  
47

48  
49 *"...I was told I can't really drink much and that's all I used to do on a*  
50 *Saturday after rugby and, so socially I'm not as active as I was..."* 6M  
51

52 *"I hate it really..., really upsetting really 'cause I can't do anything I used to*  
53 *do, like doing."* 9M  
54  
55  
56

57 **Change in focus or direction**  
58  
59  
60

1  
2  
3 All participants reported their experience of PE to have affected how they  
4 viewed and approached the future. Some adopted a fatalistic or nihilistic  
5 approach, suggesting they no longer felt in control of their destiny, which was at  
6 the mercy of future thrombotic events.  
7  
8  
9

10  
11 *“It doesn’t give you a very good outlook does it? I try not to think ten years*  
12 *time, twenty years time you know what I mean?” 3F*  
13

14  
15  
16 *“Ninety eight percent of the time I’m very fatalistic about it all now....I’ve*  
17 *kind of accepted my lot.” 5M*  
18  
19

20  
21 Many considered their experience as an opportunity to re-evaluate their lives  
22 and take positive steps to optimize their future. Some described a newfound  
23 appreciation of what was important to them, whilst others had made changes to  
24 their careers or their lifestyles.  
25  
26  
27  
28  
29

30  
31 *“But then I guess I’m lucky to still be alive. You know I’m still here....I’ve just*  
32 *got to accept that as much as it hurts, I want to see my girls grow up...So*  
33 *I’ve just got to be positive and grateful for what I have got. And thinking*  
34 *like that has helped me to go on with my life.” 3F*  
35  
36  
37

38  
39 *“I’ve gone into care work now which is great because I’ve got the strength to*  
40 *help people and its nice that I can relate to people who’ve had strokes and*  
41 *such because I think ‘I ain’t half lucky’, you I feel so blessed and lucky that*  
42 *I’m still here to help people you know. So for me its made me have a sort of*  
43 *different outlook on life but sort of more positive.” 3F*  
44  
45  
46  
47

48  
49 *“But, um, I do consider things to be a bit more, \*pause\* cherishing, have*  
50 *some cherished moments \*laughs\* especially straight after...now, I just feel*  
51 *like I’m back to normal...but I’m trying to make the most of, what I’ve*  
52 *got...which isn’t a lot...” 8F*  
53  
54  
55  
56  
57  
58  
59  
60

1  
2  
3 *"I've um, looked at what do I need to do to improve my chances of, um, living*  
4 *a healthy lifestyle...so I've been now to see a nutritionist for healthy*  
5 *eating...I don't drink um, more than 2-3 units a day, and I'll have a couple of*  
6 *days off which I wouldn't have done before, and I'm trying to look at my*  
7 *food intake and what I'm eating, to try to lose weight... so I'm just trying to*  
8 *be more sensible about my eating and drinking habits and being more*  
9 *focused on my exercise."* 7M  
10  
11  
12  
13

### 14 **Avoidance behaviours**

15  
16  
17  
18  
19  
20 Participants frequently described a modification in their day-to-day behaviours.  
21 They avoided any activity they perceived could precipitate a further PE and  
22 those receiving anticoagulation avoided anything that might increase their risk  
23 of bleeding complications. Modification of physical activity and exertion was the  
24 commonest behavior change in order to minimise exposure to potential physical  
25 trauma.  
26  
27  
28  
29

30  
31  
32 *"I was quite outgoing and robust...feel like I've gone more timid...I don't get*  
33 *involved in anything...I'm afraid I'll bang my head...I just really, really*  
34 *refrain from doing much."* 6M  
35  
36  
37

38  
39 *"...I'm certainly very careful, I don't get any cuts that you know, are*  
40 *unnecessarily from silly little things, so you'd be careful around being um,*  
41 *uh...when I was out on the road bike cycling or you know, sometimes I*  
42 *wouldn't put my helmet on, now I always put my helmet on, so it's just made*  
43 *me be a bit more careful around what I'm doing incase I you know, bleed or*  
44 *um, or something happens from that."* M7  
45  
46  
47  
48  
49  
50  
51

### 52 **Major theme 2: Post Traumatic Stress Disorder**

53  
54  
55  
56 Post traumatic stress disorder (PTSD) is characterized by a group of symptoms  
57 including flashbacks, avoidance behaviours, numbing of memories and hyper  
58  
59  
60



1  
2  
3 arousal which continue beyond a month after the traumatic event(33, 34).  
4 Almost all participants volunteered symptoms suggestive of PTSD, some  
5 describing symptom clusters which suggested a significant degree of functional  
6 disability due to the condition.  
7  
8  
9

### 10 11 **Flashbacks** 12

13  
14 Flashbacks to, and memories of, the initial PE experience were common. Ongoing  
15 anticoagulation, be it self injecting low molecular weight heparin (LMWH),  
16 taking oral anticoagulants or having blood tests acted as profound triggers to  
17 flashbacks and reminders of their perceived “near death experience”.  
18  
19  
20  
21

22  
23 *“All these sorts of things; its brought back to you all the time even when*  
24 *your not consciously thinking about it, its brought back to you all the*  
25 *time.”5M*  
26  
27

28  
29  
30 *“And then I reverted to injecting myself and then that then carried on but it*  
31 *was just a constant reminder of what had happened, even now, although its*  
32 *become routine, it just makes me think how close I came to almost dying, to*  
33 *how ill I was.”4M*  
34  
35  
36

37  
38  
39 *“For instance it might be time to my injection and it’ll just all come back to*  
40 *me. The worries, will it happen again, will I be so lucky next time?”2F*  
41  
42  
43

44  
45 Whilst some reported the content of the flashback episode to be short-lived,  
46 others experienced a more protracted experience reliving the entire distressing  
47 episode.  
48  
49

50  
51  
52 *I’ll go through the whole thing. Like it will run from start to finish like a*  
53 *movie. Its very hard to switch off once I’ve started thinking about it, it has to*  
54 *play out if you like”2F*  
55  
56  
57  
58  
59  
60

### **Numbing of memories**

Several participants recalled a blunting of their emotion during the experience with some disassociation with reality.

*"...some sense which it doesn't seem real..." 5M*

*"...seems like, as if it kind of wasn't real..." 8F*

Others described the use of denial, be it conscious or sub conscious in dealing with the trauma of the experience.

*"...for a long time I was just, well, in denial I think, "oh no, I'll be alright, I'll be alright..."6M*

*"But when they (thoughts/feelings associated with major PE) come to the surface, well I have puzzles and things which I do to block it out...I don't want to think about it so my puzzles are one way of avoiding thinking about it for me." 1F*

### **Hyper vigilance**

Patients reported increased increased vigilance and awareness of anxiety any symptoms they felt could be associated with a recurrent PE. Such awareness was associated with increased anxiety and catastrophising thought processes.

*"In the beginning I was very very very weary, very scared. I would only have to get a sort of sign or niggle in my chest and I would start to panic thinking that it was going to happen again or I'd end up in a heap on the floor"2F*

*"It was always on my mind. It made me more conscious of making sure that if I was on my own somewhere people knew....I taught my daughter nannies house number...just in case something did happen. It just makes me angry to think that no-one can tell me I won't have another one and now I have to live my life by this"2F*

### **Major theme 3: Support needs**

All participants described needing a significant degree of support and it was evident that the support needed was ongoing but differed over time. The nature of support required often required clinical and or specialist knowledge, and appeared to be an unmet need which could only be met by appropriate healthcare professionals.

#### **Information**

During the initial stages of diagnosis and treatment, participants required considerable information regarding their condition, their prognosis and long term treatment. Many described their care as focusing on the biomedical with little attention given to support through information giving or psychological care.

*“None of them actually said anything to make me understand, it was just a case of ‘you’ve had these clots, they’ve gone to your lungs’, none of the rest of what else could have happened before they got to the lungs registered or how serious it was when it got to there.”5F*

Where information was not freely available, participants would seek answers on the Internet. This could result in accessing upsetting information, which form of information gathering, without access to additional support or proved more distressing than helpful.

*“Yeah after looking on the internet I did the whole sitting, crying, rocking thing thinking ‘oh me god’ and then told myself off for looking to be honest because finding out that way with no-one there to kind of go through it with me knocked me for six.” M5*

1  
2  
3 Participants were clear on the degree of information they required: frequently  
4 describing the need to understand why this had happened to them and what  
5 they should/ should not do from then on to rehabilitate effectively.  
6  
7  
8

9  
10 *"It causes me quite a lot of concern doing things...and I'm scared of doing*  
11 *them in case it happens again....I just get so annoyed that's that the thing*  
12 *that will stop me, because I worry that if I get a bit out of breath or feel my*  
13 *heart going that I'll end up in a heap on the floor basically...but I wouldn't*  
14 *worry as much if I just knew what was causing it, or someone could tell me*  
15 *how much I can push myself"*  
16  
17  
18  
19

20  
21 *"It just annoys me because I just can't achieve what I used to achieve and I*  
22 *just haven't got the answers as to why. Why can't I? What's stopping me?*  
23 *What's making that happen to me? If I had the answers I'd be alright with*  
24 *it. I'd get on with it". 3F*  
25  
26  
27  
28  
29

30 When basic information was provided, including realistic outcomes, participants  
31 were able to make more sense of their lives and symptoms, describing a more  
32 positive rehabilitation.  
33  
34  
35  
36

37 *"So I asked if he could provide me with some information about what was*  
38 *the likely cause and some information about what I could expect or hope for*  
39 *really in recovering for me which was quite a fortuitous bit of information*  
40 *that I got which encouraged me a bit but it sort of did seem possible that by*  
41 *just keeping on with the blood thinning that these could eventually get re-*  
42 *absorbed and I could get back to sort of normal activity."* 4M  
43  
44  
45  
46  
47  
48

### 49 **Empathy**

50 Participants considered themselves to have experienced a narrow escape from  
51 death and as described before expressed considerable psychological distress  
52 after the event. They did not feel that healthcare professionals fully appreciated  
53 the seriousness of their experience and thus did not understand the distress  
54 associated with symptoms suggestive of VTE recurrence.  
55  
56  
57  
58  
59  
60

1  
2  
3  
4  
5  
6  
7  
8  
9  
10  
11  
12  
*"But I cant remember thinking that you know, I might have died, that my daughter might not have had her mum, and no one helping to make sure that I understood what was going on, or what was wrong with me, or how this would effect my life. I just remember feeling quite resentful of the medical staff." 2F*

13  
14  
15  
16  
17  
18  
19  
20  
21  
22  
*"And I did start to panic then and think well you know if I had a pain in the chest again I could be telling someone what I think it is but would they actually take my word for it kind of thing. And I did actually feel that it wasn't really taken too seriously. I mean the fact that it could of killed me and they had a very blasé approach toward it." 2F*

### 23 24 **Access to support**

25  
26  
27  
28  
29  
30  
31  
32  
33  
34  
35  
36  
37  
38  
39  
40  
41  
42  
43  
44  
45  
46  
47  
48  
49  
50  
51  
52  
53  
54  
55  
56  
57  
58  
59  
60  
Whilst there was a significant requirement for information and support from healthcare professionals, some participants also identified the potential benefits of self-help/ support groups. The opportunity to meet other people who understood their experiences and associated feelings was considered a positive thing and there was a belief that several unmet needs could be provided by fellow PE patients.

38  
39  
40  
41  
42  
43  
44  
45  
46  
47  
48  
49  
50  
51  
52  
*"I would have loved, and still would like some sort of group thing or support to be available to help me come to terms with what's happened to me...somewhere where somebody could have explained 'yeah its normal to feel like that' etcetera, you know like maybe other people who had been through the same thing. I don't think I would of felt so on my own then.... Just to have this level of conversation with somebody back then would have helped massively. To help me process it all through, because it was very 'off you go' and that was that". 5M*

## 54 55 **Discussion**

1  
2  
3 Venous thromboembolism is a common medical condition, which may cause a  
4 spectrum of physical symptoms. In its most severe form, major symptomatic  
5 pulmonary emboli may lead to cardiovascular compromise and even death.  
6  
7 Whilst the long-term complications such as post thrombotic syndrome and  
8 pulmonary hypertension are well recognized, little has been known about the  
9 psychological impact of symptomatic VTE. In our study of previously healthy  
10 adults who experienced a symptomatic pulmonary embolus we have identified  
11 that the psychological consequences of experiencing symptomatic VTE are  
12 considerable. The development of VTE is considered a life-changing event with  
13 some patients feeling a loss of identity and role in life. More concerning appears  
14 to be a profound and ongoing collection of symptoms suggestive of the  
15 development of PTSD. This is the first time that PTSD has been identified as a  
16 consequence of VTE. To some extent these findings shouldn't come as a surprise  
17 since features that contribute to the development of PTSD are common in VTE  
18 patients; patients of previous good health experience a traumatic life threatening  
19 event and the face a future of uncertainty regarding recurrence. However, these  
20 findings raise the possibility that as healthcare professionals we are failing to  
21 recognise the psychological needs of our patients.  
22  
23  
24  
25  
26  
27  
28  
29  
30  
31  
32  
33  
34

35 There are several limitations to this study: the number of participants is small  
36 and although the numbers are appropriate for such qualitative methodology, a  
37 larger study is clearly needed to identify the true prevalence of PTSD using a  
38 validated screening tool. In particular it is not possible to identify whether PTSD  
39 may be more prevalent in certain sub groups of patients with PE. Within the  
40 group sampled the majority were younger than 45 years old and it is possible  
41 that the greater degree of psychological distress is seen in younger patients with  
42 less illness experience. Likewise PTSD may be more prevalent in those without  
43 obvious precipitating cause of VTE since they will live with ongoing uncertainty  
44 regarding recurrence. The long term treatment plan may also play a role and it  
45 would be interesting to see whether PTSD is more likely to develop in those with  
46 ongoing reminders of their illness such as long term anticoagulation.  
47  
48  
49  
50  
51  
52  
53  
54

55 There is ~~also~~ a possibility of selection bias since all participants interviewed had  
56 required admission to hospital for their symptomatic PE and as such were likely  
57  
58  
59  
60

1  
2  
3 to be those with more severe symptoms and thus a more traumatic experience.  
4 Whilst the likelihood of bias is acknowledged, it shouldn't invalidate the findings  
5 in the context of those with the most significant VTE episodes. It would be  
6 presumptive to assume that all VTE patients experienced PTSD in the same way  
7 that one acknowledges that PTSD occurs in some but not all myocardial  
8 infarction patients. It does, however, highlight that of those developing VTE, a  
9 subgroup may experience significant psychological sequelae and it would make  
10 clinical sense to identify those at greatest risk and arrange appropriate support.  
11 At present it is not possible to identify whether the development of PTSD is  
12 directly related to the VTE experience or whether there are particular pre  
13 morbid characteristics that predispose people. It is of interest to note that  
14 participants felt they received limited information and would have liked more  
15 opportunities to understand their condition from an appropriately trained  
16 professional rather than seek information themselves on the internet.  
17 Finally this study highlights several areas of opportunity for healthcare  
18 professionals to deliver support to patients post VTE be it through information  
19 giving, empathy or identifying psychological distress early on. It is possible early  
20 intervention may reduce the development of long-term psychological distress  
21 and the ongoing challenges it brings.  
22  
23  
24  
25  
26  
27  
28  
29  
30  
31  
32  
33  
34

35  
36 SN affirms that the manuscript is an honest, accurate, and transparent account of  
37 the study being reported; that no important aspects of the study have been  
38 omitted; and that any discrepancies from the study as planned (and, if relevant,  
39 registered) have been explained.  
40  
41  
42  
43  
44  
45  
46  
47  
48  
49  
50  
51  
52  
53  
54  
55  
56  
57  
58  
59  
60

## References

1. Silverstein MD, Heit JA, Mohr DN, Petterson TM, O'Fallon WM, Melton LJ, 3rd. Trends in the incidence of deep vein thrombosis and pulmonary embolism: a 25-year population-based study. *Arch Intern Med*. [Research Support, Non-U.S. Gov't Research Support, U.S. Gov't, P.H.S.]. 1998 Mar 23;158(6):585-93.
2. Prandoni P, Lensing AW, Cogo A, Cuppini S, Villalta S, Carta M, et al. The long-term clinical course of acute deep venous thrombosis. *Ann Intern Med*. 1996 Jul 1;125(1):1-7.
3. Yamaki T, Hamahata A, Soejima K, Kono T, Nozaki M, Sakurai H. Factors predicting development of post-thrombotic syndrome in patients with a first episode of deep vein thrombosis: preliminary report. *Eur J Vasc Endovasc Surg*. 2011 Jan;41(1):126-33.
4. Mohr DN, Silverstein MD, Heit JA, Petterson TM, O'Fallon WM, Melton LJ. The venous stasis syndrome after deep venous thrombosis or pulmonary embolism: a population-based study. *Mayo Clin Proc*. [Research Support, Non-U.S. Gov't Research Support, U.S. Gov't, P.H.S.]. 2000 Dec;75(12):1249-56.
5. Kahn SR, Shrier I, Julian JA, Ducruet T, Arsenaault L, Miron MJ, et al. Determinants and time course of the postthrombotic syndrome after acute deep venous thrombosis. *Ann Intern Med*. [Multicenter Study Research Support, Non-U.S. Gov't]. 2008 Nov 18;149(10):698-707.
6. Pengo V, Lensing AW, Prins MH, Marchiori A, Davidson BL, Tiozzo F, et al. Incidence of chronic thromboembolic pulmonary hypertension after pulmonary embolism. *N Engl J Med*. 2004 May 27;350(22):2257-64.
7. Becattini C, Agnelli G, Pesavento R, Silingardi M, Poggio R, Taliani MR, et al. Incidence of chronic thromboembolic pulmonary hypertension after a first episode of pulmonary embolism. *Chest*. [Multicenter Study]. 2006 Jul;130(1):172-5.
8. Poli D, Grifoni E, Antonucci E, Arcangeli C, Prisco D, Abbate R, et al. Incidence of recurrent venous thromboembolism and of chronic thromboembolic pulmonary hypertension in patients after a first episode of pulmonary embolism. *J Thromb Thrombolysis*. 2010 Oct;30(3):294-9.
9. Vedantham S. Valvular dysfunction and venous obstruction in the post-thrombotic syndrome. *Thromb Res*. [Review]. 2009;123 Suppl 4:S62-5.
10. Stein E, Ramakrishna H, Augoustides JG. Recent advances in chronic thromboembolic pulmonary hypertension. *J Cardiothorac Vasc Anesth*. [Review]. 2011 Aug;25(4):744-8.
11. Kim NH. Assessment of operability in chronic thromboembolic pulmonary hypertension. *Proc Am Thorac Soc*. [Research Support, Non-U.S. Gov't Review]. 2006 Sep;3(7):584-8.
12. Riedel M, Stanek V, Widimsky J, Prerovsky I. Longterm follow-up of patients with pulmonary thromboembolism. Late prognosis and evolution of hemodynamic and respiratory data. *Chest*. 1982 Feb;81(2):151-8.
13. Kahn SR, Hirsch A, Shrier I. Effect of postthrombotic syndrome on health-related quality of life after deep venous thrombosis. *Arch Intern Med*. [Research Support, Non-U.S. Gov't]. 2002 May 27;162(10):1144-8.



- 1  
2  
3 14. Kahn SR, Shbaklo H, Lamping DL, Holcroft CA, Shrier I, Miron MJ, et al.  
4 Determinants of health-related quality of life during the 2 years following deep  
5 vein thrombosis. *J Thromb Haemost*. [Research Support, Non-U.S. Gov't]. 2008  
6 Jul;6(7):1105-12.  
7  
8 15. van Korlaar I, Vossen C, Rosendaal F, Cameron L, Bovill E, Kaptein A.  
9 Quality of life in venous disease. *Thromb Haemost*. [Research Support, Non-U.S.  
10 Gov't  
11 Research Support, U.S. Gov't, P.H.S.  
12 Review]. 2003 Jul;90(1):27-35.  
13 16. van Korlaar IM, Vossen CY, Rosendaal FR, Bovill EG, Cushman M, Naud S,  
14 et al. The impact of venous thrombosis on quality of life. *Thromb Res*. [Clinical  
15 Trial  
16 Research Support, U.S. Gov't, P.H.S.]. 2004;114(1):11-8.  
17 17. Lukas PS, Krummenacher R, Biasiutti FD, Begre S, Znoj H, von Kanel R.  
18 Association of fatigue and psychological distress with quality of life in patients  
19 with a previous venous thromboembolic event. *Thromb Haemost*. 2009  
20 Dec;102(6):1219-26.  
21 18. Lerman C, Croyle R. Psychological issues in genetic testing for breast  
22 cancer susceptibility. *Arch Intern Med*. [Research Support, Non-U.S. Gov't  
23 Research Support, U.S. Gov't, P.H.S.  
24 Review]. 1994 Mar 28;154(6):609-16.  
25 19. Noble S. Low-molecular-weight heparin and survival in lung cancer.  
26 *Thromb Res*. 2012 Apr;129 Suppl 1:S114-8.  
27 20. Haralabopoulos GC, Grant DS, Kleinman HK, Maragoudakis ME. Thrombin  
28 promotes endothelial cell alignment in Matrigel in vitro and angiogenesis in vivo.  
29 *Am J Physiol*. [Research Support, Non-U.S. Gov't]. 1997 Jul;273(1 Pt 1):C239-45.  
30 21. Zabora J, BrintzenhofeSzoc K, Curbow B, Hooker C, Piantadosi S. The  
31 prevalence of psychological distress by cancer site. *Psychooncology*. 2001 Jan-  
32 Feb;10(1):19-28.  
33 22. White RH. The epidemiology of venous thromboembolism. *Circulation*.  
34 [Review]. 2003 Jun 17;107(23 Suppl 1):I4-8.  
35 23. Shalev AY. Post-traumatic stress disorder: a biopsychological perspective.  
36 *Isr J Psychiatry Relat Sci*. [Review]. 1993;30(2):102-9.  
37 24. Bennett P, Brooke S. Intrusive memories, post-traumatic stress disorder  
38 and myocardial infarction. *Br J Clin Psychol*. 1999 Nov;38 ( Pt 4):411-6.  
39 25. Tedstone JE, Tarrier N. Posttraumatic stress disorder following medical  
40 illness and treatment. *Clin Psychol Rev*. [Review]. 2003 May;23(3):409-48.  
41 26. Alloy LB, Abramson LY. Learned helplessness, depression, and the illusion  
42 of control. *J Pers Soc Psychol*. [Research Support, U.S. Gov't, P.H.S.]. 1982  
43 Jun;42(6):1114-26.  
44 27. Ireys HT, Werthamer-Larsson LA, Kolodner KB, Gross SS. Mental health of  
45 young adults with chronic illness: the mediating effect of perceived impact. *J*  
46 *Pediatr Psychol*. [Clinical Trial  
47 Randomized Controlled Trial  
48 Research Support, U.S. Gov't, P.H.S.]. 1994 Apr;19(2):205-22.  
49 28. Moores LK. Medical uncertainty: informing decision making for patients  
50 with acute pulmonary embolism. *Chest*. [Comment  
51 Editorial]. 2009 Oct;136(4):952-3.  
52  
53  
54  
55  
56  
57  
58  
59  
60

- 1  
2  
3 29. Noble SI, Finlay IG. Is long-term low-molecular-weight heparin acceptable  
4 to palliative care patients in the treatment of cancer related venous  
5 thromboembolism? A qualitative study. Palliat Med. 2005 Apr;19(3):197-201.  
6  
7 30. Noble SI, Nelson A, Finlay IG. Factors influencing hospice  
8 thromboprophylaxis policy: a qualitative study. Palliat Med. 2008 Oct;22(7):808-  
9 13.  
10 31. Noble SI, Nelson A, Turner C, Finlay IG. Acceptability of low molecular  
11 weight heparin thromboprophylaxis for inpatients receiving palliative care:  
12 qualitative study. Bmj. 2006 Mar 11;332(7541):577-80.  
13 32. Smith JA, Larkin MH, Flowers P. Interpretative phenomenological analysis  
14 : theory, method and research. Los Angeles ; London: SAGE; 2009.  
15 33. The ICD-10 classification of mental and behavioural disorders : diagnostic  
16 criteria for research: WHO; 1993.  
17 34. Diagnostic and statistical manual of mental disorders : DSM-5. Fifth  
18 edition. ed.  
19  
20  
21  
22  
23  
24  
25  
26  
27  
28  
29  
30  
31  
32  
33  
34  
35  
36  
37  
38  
39  
40  
41  
42  
43  
44  
45  
46  
47  
48  
49  
50  
51  
52  
53  
54  
55  
56  
57  
58  
59  
60

1  
2  
3  
4  
5  
6  
7  
8  
9  
10  
11  
12  
13  
14  
15  
16  
17  
18  
19  
20  
21  
22  
23  
24  
25  
26  
27  
28  
29  
30  
31  
32  
33  
34  
35  
36  
37  
38  
39  
40  
41  
42  
43  
44  
45  
46  
47  
48  
49  
50  
51  
52  
53  
54  
55  
56  
57  
58  
59  
60

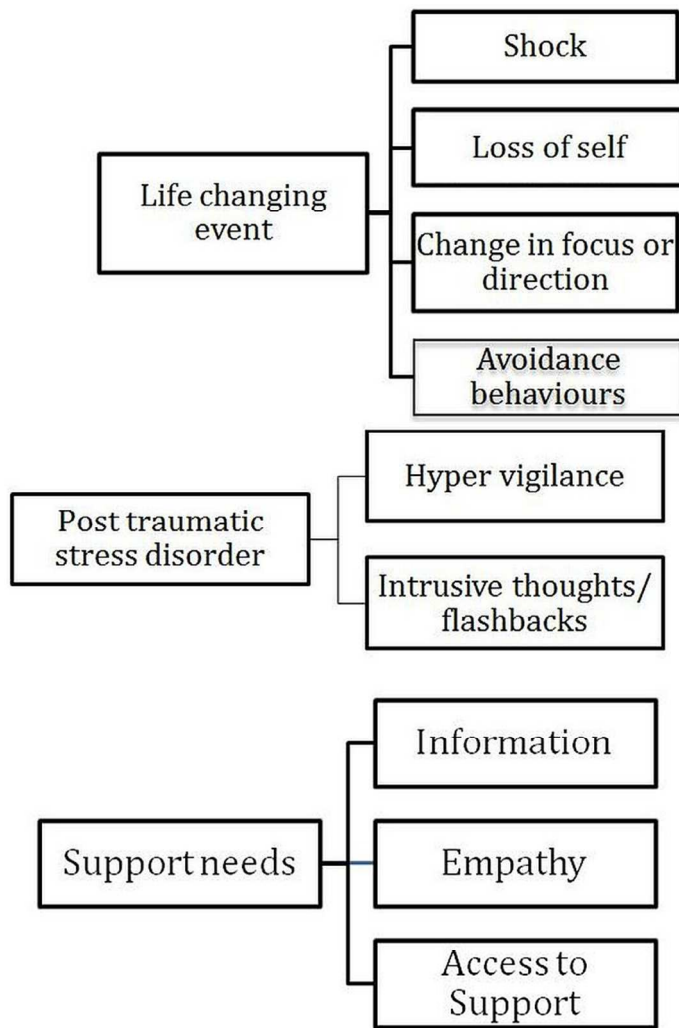

Major themes and associated sub-themes  
90x94mm (300 x 300 DPI)

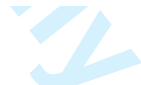

## COREC CHECKLIST

All applicable items in the checklist have been addressed within the manuscript. These have been outlined in the comments section of the table below.

| No                                                 | Item                                     | Guide questions                                                                                                                                  | Comments and page                                                   |
|----------------------------------------------------|------------------------------------------|--------------------------------------------------------------------------------------------------------------------------------------------------|---------------------------------------------------------------------|
| <b>Domain 1:<br/>Research team and reflexivity</b> |                                          |                                                                                                                                                  |                                                                     |
| Personal Characteristics                           |                                          |                                                                                                                                                  |                                                                     |
| 1.                                                 | Interviewer/facilitator                  | Which author/s conducted the interview or focus group?                                                                                           | RL and JW                                                           |
| 2.                                                 | Credentials                              | What were the researcher's credentials? <i>E.g. PhD, MD</i>                                                                                      | MSc students                                                        |
| 3.                                                 | Occupation                               | What was their occupation at the time of the study?                                                                                              | MSc students                                                        |
| 4.                                                 | Gender                                   | Was the researcher male or female?                                                                                                               | Female                                                              |
| 5.                                                 | Experience and training                  | What experience or training did the researcher have?                                                                                             | Experienced clinical psychologists trained in qualitative research. |
| Relationship with participants                     |                                          |                                                                                                                                                  |                                                                     |
| 6.                                                 | Relationship established                 | Was a relationship established prior to study commencement?                                                                                      | No prior relationship                                               |
| 7.                                                 | Participant knowledge of the interviewer | What did the participants know about the researcher? <i>e.g. personal goals, reasons for doing the research</i>                                  | No prior knowledge                                                  |
| 8.                                                 | Interviewer characteristics              | What characteristics were reported about the interviewer/facilitator? <i>e.g. Bias, assumptions, reasons and interests in the research topic</i> | No stated previous interest in VTE management                       |

|                                   |                                       |                                                                                                                                                                 |                                          |
|-----------------------------------|---------------------------------------|-----------------------------------------------------------------------------------------------------------------------------------------------------------------|------------------------------------------|
| <b>Domain 2:<br/>study design</b> |                                       |                                                                                                                                                                 |                                          |
| Theoretical framework             |                                       |                                                                                                                                                                 |                                          |
| 9.                                | Methodological orientation and Theory | What methodological orientation was stated to underpin the study? <i>e.g. grounded theory, discourse analysis, ethnography, phenomenology, content analysis</i> | Interpretative phenomenological analysis |
| Participant selection             |                                       |                                                                                                                                                                 |                                          |
| 10.                               | Sampling                              | How were participants selected? <i>e.g. purposive, convenience, consecutive, snowball</i>                                                                       | Sequential screening                     |
| 11.                               | Method of approach                    | How were participants approached? <i>e.g. face-to-face, telephone, mail, email</i>                                                                              | Eleven                                   |
| 12.                               | Sample size                           | How many participants were in the study?                                                                                                                        | Nine                                     |
| 13.                               | Non-participation                     | How many people refused to participate or dropped out? Reasons?                                                                                                 | Two. No reasons sought                   |
| Setting                           |                                       |                                                                                                                                                                 |                                          |
| 14.                               | Setting of data collection            | Where was the data collected? <i>e.g. home, clinic, workplace</i>                                                                                               | Clinic                                   |
| 15.                               | Presence of non-participants          | Was anyone else present besides the participants and researchers?                                                                                               | No                                       |
| 16.                               | Description of sample                 | What are the important characteristics of the sample? <i>e.g. demographic data, date</i>                                                                        | Given in table 1                         |
| Data collection                   |                                       |                                                                                                                                                                 |                                          |
| 17.                               | Interview                             | Were questions,                                                                                                                                                 | Prompt questions                         |

|                                         |                                |                                                                          |                                                           |
|-----------------------------------------|--------------------------------|--------------------------------------------------------------------------|-----------------------------------------------------------|
|                                         | guide                          | prompts, guides provided by the authors? Was it pilot tested?            | following pilot testing                                   |
| 18.                                     | Repeat interviews              | Were repeat interviews carried out? If yes, how many?                    | No                                                        |
| 19.                                     | Audio/visual recording         | Did the research use audio or visual recording to collect the data?      | Digital audiorecording                                    |
| 20.                                     | Field notes                    | Were field notes made during and/or after the interview or focus group?  | Field notes were taken                                    |
| 21.                                     | Duration                       | What was the duration of the interviews or focus group?                  | Thirty minutes                                            |
| 22.                                     | Data saturation                | Was data saturation discussed?                                           | No since we used interpretative phenomenological analysis |
| 23.                                     | Transcripts returned           | Were transcripts returned to participants for comment and/or correction? | No                                                        |
| <b>Domain 3: analysis and findingsz</b> |                                |                                                                          |                                                           |
| Data analysis                           |                                |                                                                          |                                                           |
| 24.                                     | Number of data coders          | How many data coders coded the data?                                     | Two                                                       |
| 25.                                     | Description of the coding tree | Did authors provide a description of the coding tree?                    | Yes                                                       |
| 26.                                     | Derivation of themes           | Were themes identified in advance or derived from the data?              | Derived from the data                                     |
| 27.                                     | Software                       | What software, if applicable, was used to manage the data?               | Not applicable                                            |
| 28.                                     | Participant checking           | Did participants provide feedback on the findings?                       | No                                                        |
| Reporting                               |                                |                                                                          |                                                           |
| 29.                                     | Quotations presented           | Were participant quotations                                              | Yes                                                       |

|     |                              |                                                                                                              |     |
|-----|------------------------------|--------------------------------------------------------------------------------------------------------------|-----|
|     |                              | presented to illustrate the themes / findings? Was each quotation identified? e.g. <i>participant number</i> |     |
| 30. | Data and findings consistent | Was there consistency between the data presented and the findings?                                           | Yes |
| 31. | Clarity of major themes      | Were major themes clearly presented in the findings?                                                         | Yes |
| 32. | Clarity of minor themes      | Is there a description of diverse cases or discussion of minor themes?                                       | Yes |
